# Supplementary material for: Impact of dietary changes on retinal neuronal plasticity in rodent models of physical and psychological trauma
Source: Front Genet. 2024 Sep 13;15:1373447. doi: 10.3389/fgene.2024.1373447 (PMC11427283; doi:10.3389/fgene.2024.1373447)
Supplement: Supplementary file 1 [file Table2.XLSX]

## Sheet: Table S1
Table S1: Common DEGs (p < 0.05) identified between HC diet and 1% LA diet group post-TBI
DEGs	Retina House Chow Blast		Retina 1% LA Diet Blast
	pv.a1	fc.a1	pv.a1	fc.a1
Acad10	0.00204419	-0.645658	0.0104659	0.611995
Apol9a	0.0421813	-0.279457	0.00811996	0.485388
Egr1	0.0244579	-0.522252	0.0204295	0.706726
Eif2ak2	0.033659	-0.208845	0.0139379	0.351601
Htr3a	0.0278088	-0.230432	0.0289892	0.275148
Ifi27l2b	0.0184796	-0.364566	0.0221391	0.394947
Irf7	0.0269008	-0.389719	0.0105846	0.891388
Lgals9	0.0423099	-0.286832	0.0474259	0.524901
Lox	0.00760927	-0.300636	0.0161522	0.388361
Nmi	0.0259155	-0.219136	0.0266812	0.393995
Rtp4	0.00690953	-0.487633	0.034687	0.700093
Wipi1	0.00640954	-0.386702	0.0316254	0.255335
Zc3h12d	0.0346529	-0.444043	0.0230535	0.310566
Cep89	0.00558924	0.249334	0.0438302	-0.16687
Cldn2	0.0222274	0.703787	0.0231654	-0.223549
Dync1h1	0.0321895	0.214993	0.0471018	-0.183728
Gmcl1	0.025923	0.181512	0.0498531	-0.271651
Hnrnpr	0.00814506	0.241826	0.0178083	-0.183737
Olr1361	0.017827	0.200717	0.00923142	-0.188461
P2rx2	0.0392561	0.200306	0.0460925	-0.287137
Plagl2	0.0450942	0.261246	0.0163517	-0.243742
Plcxd2	0.00154751	0.501149	0.0443364	-0.459214

## Sheet: Table S2 
Table S2: Top biological pathways in retina (p < 0.05) identified through IPA for post-TBI in HC diet group
Ingenuity Canonical Pathways	-log(p-value)	Ratio	z-score	Molecules
Th2 Pathway	1.43	0.109	-2.714	ACVR1B,Aph1c,CD3G,CD40,GFI1,HLA-DRB5,ICAM1,IL24,IL2RG,IL5,PIK3C2B,PIK3C2G,PIK3R6,S1PR1,TRB
CD40 Signaling	1.92	0.149	-1.265	CD40,ICAM1,MAP2K2,MAP2K7,MAPKAPK2,PIK3C2B,PIK3C2G,PIK3R6,TRAF3,TRAF6
IL-8 Signaling	2.5	0.119	-1.147	Cdc42,CXCR1,FNBP1,GNA14,GNAL,GNB2,GNG12,HMOX1,ICAM1,MAP2K2,MTOR,NRAS,PIK3C2B,PIK3C2G,PIK3R6,PLCB2,PLD1,RAB11FIP2,RAC2,RAP1A,RHOC,RHOT1,TRAF6,VEGFA,VEGFC
IL-2 Signaling	1.7	0.145	-0.333	IL2RG,MAP2K2,NRAS,PIK3C2B,PIK3C2G,PIK3R6,PTPN11,RAP1A,SOS1
IL-6 Signaling	1.95	0.124	-0.775	COL1A1,HSPB1,IL1A,LBP,MAP2K2,MAP2K7,MAPKAPK2,NRAS,PIK3C2B,PIK3C2G,PIK3R6,PTPN11,RAP1A,SOS1,TRAF6,VEGFA
S100 Family Signaling Pathway	1.72	0.0855	-0.985	ACKR3,AHNAK,AREG,ATF2,ATP5F1D,ATP5PO,CACNA1B,CACNA1H,CACNA2D3,CACNG6,Calm1 (includes others),CASP7,CCR10,CCR9,CD36,CDKN1A,CELSR2,CREB3L3,CTSD,CXCR1,DLC1,FCGR2A,FCGR2B,FCGR3A/FCGR3B,FGFRL1,FZD3,FZD6,GABBR1,GLP1R,GPR119,GPR85,GPRC5A,GPRC5B,HIF1A,HTR1F,HTR2C,IFNK,MAP2K2,MAP2K7,MCHR1,MMP19,NAPSA,OPRK1,PIK3C2B,PIK3C2G,PIK3R6,PLA2G2A,PLA2G4D,PLA2G6,PLCB1,PLCB2,PLCH1,RAC2,S100B,S1PR1,SERPINF1,SP1,TAAR2,…
Neuroinflammation Signaling Pathway	2.43	0.107	-0.962	ACVR1B,Aph1c,ATF2,BIRC5,CD40,CFLAR,CREB3L3,GABBR1,GABRA1,GABRB1,GABRB3,GABRR1,GRIN2A,HLA-DRB5,HMOX1,ICAM1,IRF7,KCNJ6,KLK1,NFATC3,PIK3C2B,PIK3C2G,PIK3R6,PLA2G2A,PLA2G4D,PLA2G6,RAC2,S100B,TBK1,TLR5,TLR6,TRAF3,TRAF6,ZBTB12
fMLP Signaling in Neutrophils	2.24	0.13	0.577	ACTR2,ARPC1B,Calm1 (includes others),GNA14,GNAL,GNB2,GNG12,MAP2K2,NFATC3,NRAS,PIK3C2B,PIK3C2G,PIK3R6,PLCB1,PLCB2,RAC2,RAP1A
CXCR4 Signaling	2.78	0.131	-0.258	ADCY2,ADCY6,Cdc42,EGR1,FNBP1,GNA14,GNAL,GNB2,GNG12,GUCY1B1,MAP2K2,NRAS,PAK3,PIK3C2B,PIK3C2G,PIK3R6,PLCB1,PLCB2,RAC2,RAP1A,RHOC,RHOT1
Fc Epsilon RI Signaling	3.14	0.153	-1.698	FCER1G,IL5,INPP5B,INPP5D,MAP2K2,MAP2K7,NRAS,PIK3C2B,PIK3C2G,PIK3R6,PLA2G2A,PLA2G4D,PLA2G6,PTPN11,RAC2,RAP1A,SOS1,SYNJ1
Chemokine Signaling	1.39	0.123	0.632	Calm1 (includes others),CAMK1D,CFL1,MAP2K2,NRAS,PIK3C2G,PLCB1,PLCB2,PPP1CB,RAP1A
Natural Killer Cell Signaling	1.66	0.106	1.091	CD226,CFL1,COL1A1,FCER1G,FCGR2A,FCGR3A/FCGR3B,HCST,MAP2K2,MTOR,NFATC3,NRAS,PAK3,PIK3C2B,PIK3C2G,PIK3R6,PTPN11,PTPN6,RAC2,RAP1A,SOS1,TRAF6
Ferroptosis Signaling Pathway	4.28	0.167	-1.091	AIFM2,CBS/LOC102724560,CDKN1A,EIF2AK3,FTMT,GCH1,H2AC20,H2AX,HMGCR,HMOX1,HSPB1,IREB2,LPCAT3,MAP2K2,NRAS,PEBP1,PRKAB2,RAP1A,RB1,SLC1A5,SP1,WWTR1
NRF2-mediated Oxidative Stress Response	1.38	0.097	-0.302	BACH1,Cyp2b19,Cyp2d1/Cyp2d5,CYP2F1,CYP4A22,DNAJA1,DNAJA2,DNAJB13,DNAJB5,EIF2AK3,FMO1,GPX2,HACD3,HMOX1,HSP90AA1,JUNB,MAP2K2,MAP2K7,NRAS,PIK3C2B,PIK3C2G,PIK3R6,RAP1A
Synaptogenesis Signaling Pathway	4.25	0.127	1.808	ACTR2,ADCY2,ADCY6,AP2M1,ARPC1B,ATF2,CACNA1B,Calm1 (includes others),CDH11,CDH17,CFL1,CREB3L3,DLG4,EFNA4,EPHA4,EPHB1,GRIA4,GRIN2A,GUCY1B1,MTOR,NRAS,NRXN2,PIK3C2B,PIK3C2G,PIK3R6,RAB5C,RAP1A,RELN,SGTA,SHF,SOS1,SYN1,SYT10,SYT3,SYT4,SYT6,THBS2,THBS3,VLDLR,YKT6
SNARE Signaling Pathway	2.08	0.125	0.728	ADCY2,ADCY6,CACNA1B,Calm1 (includes others),GUCY1B1,MYH7B,MYO10,RAB27A,RAB8A,SGTA,SNAP91,SYN1,SYT10,SYT3,SYT4,SYT6,YKT6
Endocannabinoid Neuronal Synapse Pathway	2.35	0.128	1.807	ADCY2,ADCY6,CACNA1B,CACNA1H,CACNA2D3,CACNG6,DNAH3,GNA14,GNAL,GNB2,GNG12,GRIA4,GRIN2A,GUCY1B1,KCNJ6,PLCB1,PLCB2,PLCH1,TRPV1
Synaptic Long Term Depression	2.53	0.121	2.294	ABHD3,CACNA1B,CACNA1H,CACNA2D3,CACNG6,CRH,GNA14,GNAL,GRIA4,GUCY1B1,MAP2K2,NPR2,NRAS,PLA2G2A,PLA2G4D,PLA2G6,PLCB1,PLCB2,PLCH1,PPP2R5D,PTPA,RAP1A,RYR3,SMARCC2
Calcium Signaling	1.46	0.1	1.213	ATF2,ATP2B3,CABIN1,CACNA1B,CACNA1H,CACNA2D3,CACNG6,Calm1 (includes others),CAMK1D,CHRNA3,CREB3L3,GRIA4,GRIN2A,HTR3A,MYH7B,MYO10,NFATC3,RAP1A,RYR3,TNNI1,TNNT1,TP63
Neurovascular Coupling Signaling Pathway	3.14	0.125	2.268	ABHD3,CACNA1B,CACNA1H,CACNA2D3,CACNG6,Calm1 (includes others),CYP4A22,ENTPD1,GABBR1,GABRA1,GABRB1,GABRB3,GABRR1,GRIA4,GRIN2A,GUCY1B1,KCNJ6,KCNMA1,LRRC26,NPR2,PLA2G2A,PLA2G4D,PLA2G6,PLCB1,PLCB2,PPP1CB,RYR3,SMARCC2,TRPV4
Dopamine Receptor Signaling	1.43	0.125	1	ADCY2,ADCY6,DDC,GCH1,GUCY1B1,PPP1CB,Ppp1cc,PPP2R5D,PTPA,PTS
Opioid Signaling Pathway	2.75	0.114	1.347	ADCY2,ADCY6,AP2M1,ATF2,BLK,CACNA1B,CACNA1H,CACNA2D3,CACNG6,Calm1 (includes others),CAMK1D,CLTA,CLTB,CREB3L3,FOSB,GNA14,GNAL,GNB2,GNG12,GRIN2A,GUCY1B1,KCNJ6,MAP2K2,MAP2K7,NRAS,OPRK1,PIK3C2G,PLCB1,RAC2,RAP1A,RYR3,SOS1
Reelin Signaling in Neurons	2.36	0.13	0.258	ACTR2,ARHGEF18,ARHGEF26,ARPC1B,BLK,CFL1,DCX,DNAH3,GRIN2A,MAP2K2,MAP2K7,MTOR,PIK3C2B,PIK3C2G,PIK3R6,RAP1A,RELN,VLDLR
CNTF Signaling	1.92	0.158	0.333	MAP2K2,MTOR,NRAS,PIK3C2B,PIK3C2G,PIK3R6,PTPN11,RAP1A,SOS1
Adrenomedullin signaling pathway	2.19	0.116	0.426	ADCY2,ADCY6,ADM,Calm1 (includes others),GNA14,GUCY1B1,HIF1A,IL1A,MAP2K2,MAP2K7,MAX,NPR2,NRAS,PIK3C2B,PIK3C2G,PIK3R6,PLCB1,PLCB2,PLCH1,RAP1A,SHF,SMARCC2,SOS1
Huntington's Disease Signaling	3.91	0.127	-0.243	ATF2,ATP5F1D,CACNA1B,CASP14,CASP7,CLTA,CLTB,CREB3L3,CTSD,DLG4,DNM3,GNA14,GNB2,GNG12,MAP2K7,MTOR,PIK3C2B,PIK3C2G,PIK3R6,PLCB1,PLCB2,Psma3l,PSMA8,PSMB8,PSMF1,RCOR1,RPS27A,SH3GL3,SOS1,SP1,TBP,TCERG1,TGM2,UBD,UBE2S,YKT6
MicroRNA Biogenesis Signaling Pathway	2.53	0.123	2.711	ADAR,AGO1,DDX5,DNAJA2,EXOSC6,EXOSC7,HMOX1,HOPX,HSP90AA1,IFNK,MTOR,NRAS,NUP107,NUP205,NUP54,NUP98,PIK3C2B,PIK3C2G,PIK3R6,RAP1A,SRSF1,TSNAX,VEGFA
Corticotropin Releasing Hormone Signaling	1.36	0.105	0.832	ADCY2,ADCY6,ATF2,CACNA1B,CACNA1H,CACNA2D3,CACNG6,Calm1 (includes others),CREB3L3,CRH,GUCY1B1,MAP2K2,NPR2,RAP1A,SMARCC2,VEGFA
Sphingosine-1-phosphate Signaling	3.05	0.15	-0.535	ACER2,ADCY2,ADCY6,CASP14,CASP7,Cdc42,FNBP1,GUCY1B1,PIK3C2B,PIK3C2G,PIK3R6,PLCB1,PLCB2,PLCH1,RAC2,RHOC,RHOT1,S1PR1
Neurotrophin/TRK Signaling	1.88	0.141	-0.302	ATF2,CREB3L3,MAP2K2,MAP2K7,NRAS,PIK3C2B,PIK3C2G,PIK3R6,PTPN11,RAP1A,SOS1
Glioblastoma Multiforme Signaling	3.42	0.14	-0.218	Cdc42,CDKN1A,CDKN2A,E2F3,FNBP1,FZD3,FZD6,MAP2K2,MTOR,NRAS,PIK3C2B,PIK3C2G,PIK3R6,PLCB1,PLCB2,PLCH1,RAC2,RAP1A,RB1,RHOC,RHOT1,SOS1,WNT10A,WNT7A
Protein Kinase A Signaling	3.21	0.109	2.137	Acp1/LOC102549052,ADCY2,ADCY6,AKAP1,AKAP10,ANAPC10,ATF2,Calm1 (includes others),CDC14B,CDC25B,CREB3L3,DUSP16,DUSP4,DUSP5,DUSP6,DUSP9,FLNC,GDPD3,GNB2,GNG12,GUCY1B1,LIPE,MAP2K2,MTMR3,NFATC3,PDE6C,PLCB1,PLCB2,PLCH1,PPP1CB,Ppp1cc,PTPN11,PTPN18,PTPN6,PTPN7,PTPRE,PTPRN,Ptprt,PTPRZ1,RAP1A,RYR3,SFN,SIRPA,SMPDL3A,TNNI1
VEGF Signaling	1.88	0.131	0.832	HIF1A,MAP2K2,NRAS,PIK3C2B,PIK3C2G,PIK3R6,PTPN11,PTPN6,RAP1A,SFN,SOS1,VEGFA,VEGFC
PDGF Signaling	1.55	0.126	0.905	EIF2AK2,INPP5B,INPP5D,MAP2K2,NRAS,PIK3C2B,PIK3C2G,PIK3R6,RAP1A,SOS1,SYNJ1
Thrombin Signaling	3.36	0.129	-0.229	ADCY2,ADCY6,ARHGEF18,ARHGEF26,CAMK1D,Cdc42,F2,FNBP1,GATA4,GNA14,GNAL,GNB2,GNG12,GUCY1B1,MAP2K2,NRAS,PIK3C2B,PIK3C2G,PIK3R6,PLCB1,PLCB2,PLCH1,PPP1CB,RAC2,RAP1A,RHOC,RHOT1,SOS1,TBP
Endothelin-1 Signaling	2.64	0.124	0.626	ABHD3,ADCY2,ADCY6,CASP14,CASP7,GNA14,GNAL,GUCY1B1,HMOX1,NPR2,NRAS,PIK3C2B,PIK3C2G,PIK3R6,PLA2G2A,PLA2G4D,PLA2G6,PLCB1,PLCB2,PLCH1,PLD1,RAP1A,SHF,SOS1
Relaxin Signaling	1.85	0.116	0.632	ADCY2,ADCY6,GDPD3,GNA14,GNAL,GNB2,GNG12,GUCY1B1,NPR2,PDE6C,PIK3C2B,PIK3C2G,PIK3R6,RAP1A,RLN1,SMARCC2,SMPDL3A,VEGFA
Ephrin Receptor Signaling	2.73	0.124	0.688	ACTR2,ARPC1B,ATF2,CFL1,CREB3L3,DOK1,EFNA4,EPHA4,EPHB1,GNA14,GNAL,GNB2,GNG12,GRIN2A,ITGA1,MAP2K2,NRAS,PAK3,PIK3C2G,PTPN11,RAC2,RAP1A,SOS1,VEGFA,VEGFC
Apelin Endothelial Signaling Pathway	3.41	0.149	0.728	ADCY2,ADCY6,Calm1 (includes others),GNA14,GNAL,GNB2,GNG12,GUCY1B1,HIF1A,ICAM1,MAP2K2,MTOR,NRAS,PIK3C2B,PIK3C2G,PIK3R6,PLCB1,PLCB2,PRKAB2,RAP1A,SP1
Aryl Hydrocarbon Receptor Signaling	1.75	0.113	-0.535	AHRR,ALDH1L2,ALDH3B1,ALDH6A1,CDKN1A,CDKN2A,CTSD,HSP90AA1,HSPB1,IL1A,NR0B2,NR2F1,RARA,RARG,RB1,SP1,TFDP1,TGM2
P2Y Purigenic Receptor Signaling Pathway	1.84	0.12	0.277	ADCY2,ADCY6,ATF2,CREB3L3,GNB2,GNG12,GUCY1B1,MAP2K2,NRAS,PIK3C2B,PIK3C2G,PIK3R6,PLCB1,PLCB2,PLCH1,RAP1A
Sirtuin Signaling Pathway	1.3	0.0922	0.626	ARNTL,ATG12,ATG16L1,ATG4C,ATP5F1D,CPS1,DUSP6,GABARAPL1,GABPA,H4C11,HIF1A,MAP1LC3B,MT-ND6,MTOR,NDUFA10,NDUFA2,NDUFA4,NDUFS4,NDUFS7,PPIF,SP1,TOMM20L,TOMM70,TSPO,TUBA4A,TUBA8,XPC
PPARÎ±/RXRÎ± Activation	2.61	0.123	-1.414	ACAA1,ACOX1,ACVR1B,ADCY2,ADCY6,ADIPOR2,APOA1,CD36,CKAP5,GNA14,GUCY1B1,HSP90AA1,MAP2K2,MAP2K7,NR0B2,NR2F1,NRAS,PLCB1,PLCB2,PLCH1,PRKAB2,RAP1A,SOS1,TRAF6
Signaling by Rho Family GTPases	1.74	0.101	-1.147	ACTR2,ARHGEF18,ARPC1B,Cdc42,CDH11,CDH17,CFL1,DIAPH3,FNBP1,GNA14,GNAL,GNB2,GNG12,ITGA1,MAP2K2,MAP2K7,MSN,PAK3,PIK3C2B,PIK3C2G,PIK3R6,PIP5K1C,PLD1,RAC2,RHOC,RHOT1,SEPTIN6
RHOGDI Signaling	1.96	0.109	-0.775	ACTR2,ARHGAP9,ARHGEF18,ARPC1B,Cdc42,CDH11,CDH17,CFL1,DGKZ,DLC1,FNBP1,GNA14,GNAL,GNB2,GNG12,ITGA1,MSN,MYH7B,MYO10,PAK3,PIP5K1C,RAC2,RHOC,RHOT1
Actin Cytoskeleton Signaling	2.5	0.115	-1.279	ACTR2,ARPC1B,BRK1,CFL1,DIAPH3,F2,FGF13,FGF21,FN1,GNG12,ITGA1,LBP,MAP2K2,MSN,MYH7B,MYO10,NCKAP1,NRAS,PAK3,PIK3C2B,PIK3C2G,PIK3R6,PIP5K1C,PPP1CB,RAC2,RAP1A,SOS1,TMSB10/TMSB4X
Actin Nucleation by ARP-WASP Complex	1.37	0.118	0.707	ACTR2,ARPC1B,Cdc42,FNBP1,ITGA1,NRAS,RAC2,RAP1A,RHOC,RHOT1,SOS1
CDK5 Signaling	1.71	0.122	-1.155	ADCY2,ADCY6,EGR1,FOSB,GNAL,GUCY1B1,LAMC2,MAP2K2,NRAS,PPP1CB,Ppp1cc,PPP2R5D,PTPA,RAP1A
WNT/Ca+ pathway	1.54	0.136	0.333	ATF2,CREB3L3,FZD3,FZD6,NFATC3,PDE6C,PLCB1,PLCB2,PLCH1
AMPK Signaling	2.27	0.112	-0.229	ACACB,ATF2,CDKN1A,CHRNA3,CREB3L3,GNA14,GNAL,GNB2,GNG12,HMGCR,ILKAP,LIPE,MTOR,PFKFB1,PFKFB2,PIK3C2B,PIK3C2G,PIK3R6,PPAT,PPM1K,PPP2R5D,PRKAB2,PTPA,RAB27A,RAB8A,SMARCC1,SMARCC2
Neutrophil Extracellular Trap Signaling Pathway	2	0.0969	-0.632	ABHD3,ATP5F1D,BLK,CASP14,CASP7,COL1A1,COL4A1,COL6A1,COL8A1,COL9A1,FCGR3A/FCGR3B,GSDMD,H4C11,HIF1A,IFNK,MAP2K2,MAP2K7,MT-ND6,MTOR,NDUFA10,NDUFA2,NDUFA4,NDUFS4,NDUFS7,PF4,PIK3C2B,PIK3C2G,PIK3R6,PLA2G2A,PLA2G4D,PLA2G6,PLCB1,PLCB2,PLCH1,PPIF,RAC2,RIPK3,TOMM20L,TOMM70,TSPO
ILK Signaling	2.76	0.124	-0.426	ATF2,Cdc42,CFL1,CREB3L3,FLNC,FN1,FNBP1,HIF1A,ILKAP,KRT18,MTOR,MYH7B,MYO10,PIK3C2B,PIK3C2G,PIK3R6,PPP2R5D,PTPA,RAC2,RHOC,RHOT1,RSU1,TMSB10/TMSB4X,VEGFA,VEGFC
Aldosterone Signaling in Epithelial Cells	2.01	0.116	0.577	ASIC1,ASIC2,DNAJA1,DNAJB13,DNAJB5,DNAJC27,HSP90AA1,HSPB1,KCNMA1,LRRC26,MAP2K2,PIK3C2B,PIK3C2G,PIK3R6,PIP5K1C,PLCB1,PLCB2,PLCH1,SLC12A1,SOS1
Hypoxia Signaling in the Cardiovascular System	1.56	0.132	1	ATF2,CREB3L3,HIF1A,HSP90AA1,UBE2C,UBE2D2,UBE2E2,UBE2S,UBE2V1,VEGFA

## Sheet: Table S3
Table S3A: Top biological pathways in retina (p < 0.05) identified through IPA for post-TBI in 8% LA diet group
Ingenuity Canonical Pathways	-log(p-value)	Ratio	z-score	Molecules
Chemokine Signaling	2.11	0.0864	-0.816	CXCL12,ERAS,GNAQ,KRAS,MAPK1,NRAS,PLCB1
CXCR4 Signaling	3.52	0.0833	-1.897	CXCL12,ERAS,GNA11,GNAQ,GNG10,ITPR1,KRAS,MAPK1,MYL1,MYL12B,MYL9,MYLPF,NRAS,PLCB1
fMLP Signaling in Neutrophils	2.4	0.0763	-0.816	ARPC5L,ERAS,GNA11,GNAQ,GNG10,ITPR1,KRAS,MAPK1,NRAS,PLCB1
G Beta Gamma Signaling	2.97	0.0853	-0.333	CACNA1E,CACNA1S,ERAS,GNA11,GNAQ,GNG10,ITPR1,KCNJ9,KRAS,MAPK1,NRAS
Leukocyte Extravasation Signaling	1.33	0.0518	-1.134	ACTA1,ACTG2,Actn3,CLDN12,CLDN23,CXCL12,MAPK1,MMP2,VAV3,VCL
Phagosome Formation	2.08	0.0446	-1.976	ADGRE1,AP1G1,ARPC5L,C3,CCR10,CHRM4,ERAS,GPR162,ITGA2B,ITPR1,KRAS,MALT1,MAPK1,MYH1,MYH11,MYH2,MYH3,MYH4,MYH6,MYH7,MYH8,MYL1,MYL12B,MYL9,MYLK,NRAS,PLAAT1,S1PR1,TIMD4,TTN,VAV3
Glioma Invasiveness Signaling	1.77	0.0822	0.447	ERAS,HMMR,KRAS,MAPK1,MMP2,NRAS
GDNF Family Ligand-Receptor Interactions	1.7	0.0789	1	DOK3,ERAS,ITPR1,KRAS,MAPK1,NRAS
SNARE Signaling Pathway	5.16	0.11	-2.324	MYH1,MYH11,MYH2,MYH3,MYH4,MYH6,MYH7,MYH8,MYL1,MYL9,SNAP25,STX1B,SYT1,SYT16,SYT9
Synaptic Long Term Potentiation	2.38	0.0758	-1	ERAS,GNA11,GNAQ,ITPR1,KRAS,MAPK1,NRAS,PLCB1,Ppp1cc,PPP1R1A
Endocannabinoid Neuronal Synapse Pathway	1.6	0.0604	-0.707	CACNA1E,CACNA1S,GNA11,GNAQ,GNG10,ITPR1,KCNJ9,MAPK1,PLCB1
Calcium Signaling	8.44	0.114	-0.333	ACTA1,ATP2A1,CACNA1E,CACNA1S,CASQ1,HDAC11,ITPR1,MAPK1,MYH1,MYH11,MYH2,MYH3,MYH4,MYH6,MYH7,MYH8,MYL1,MYL9,SLC8A1,TNNC2,TNNI2,Tnnt3,Tpm1,Tpm2,TRDN
P2Y Purigenic Receptor Signaling Pathway	1.46	0.0602	-0.447	ERAS,GNAQ,GNG10,ITGA2B,KRAS,MAPK1,NRAS,PLCB1
Aryl Hydrocarbon Receptor Signaling	1.44	0.0566	2	AHR,ALDH1A2,ALDH4A1,CCNA2,DCT,Gsta1,GSTA3,MAPK1,TFDP1
Oxidative Phosphorylation	1.43	0.0631	-2.646	COX17,COX6A2,COX6B1,Cox8b,NDUFA2,NDUFB2,UQCR11
Adrenomedullin signaling pathway	2.36	0.0653	-0.632	C3,ERAS,GNA11,GNAQ,ITPR1,KRAS,MAPK1,MMP2,MYLK,NRAS,PLCB1,TFAP2B,TTN
Ephrin Receptor Signaling	1.55	0.0545	-0.333	ARPC5L,CXCL12,ERAS,GNA11,GNAQ,GNG10,ITGA2B,KRAS,MAPK1,NRAS,RGS3
Ephrin B Signaling	2.39	0.0972	0.816	CXCL12,GNA11,GNAQ,GNG10,MAPK1,RGS3,VAV3
Protein Kinase A Signaling	2.82	0.056	-0.775	ANAPC13,DCC,GNAQ,GNG10,GRK1,ITPR1,MAPK1,MYH2,MYH4,MYL1,MYL12B,MYL9,MYLK,MYLPF,PDE4D,PDE6B,PDE8A,PLCB1,Ppp1cc,PTPN12,PTPRE,TNNI2,TTN
VEGF Signaling	2.72	0.0909	-0.378	ACTA1,ACTG2,Actn3,ELAVL1,ERAS,KRAS,MAPK1,NRAS,VCL
Thrombin Signaling	2.73	0.0667	-1.134	ARHGEF4,ERAS,GNA11,GNAQ,GNG10,ITPR1,KRAS,MAPK1,MYL1,MYL12B,MYL9,MYLK,MYLPF,NRAS,PLCB1
Endothelin-1 Signaling	1.32	0.0515	-0.707	CASQ1,ERAS,GNA11,GNAQ,ITPR1,KRAS,MAPK1,NRAS,PLAAT1,PLCB1
Apelin Endothelial Signaling Pathway	1.34	0.0567	0.447	ERAS,GNA11,GNAQ,GNG10,KRAS,MAPK1,NRAS,PLCB1
AMPK Signaling	1.38	0.0496	-1.134	ADIPOQ,AK4,CCNA2,CKM,ELAVL1,GNA11,GNAQ,GNG10,HNF4A,MAPK1,PFKFB2,RPTOR
RHOA Signaling	2.57	0.0806	-1.897	ACTA1,ACTG2,ARPC5L,MYL1,MYL12B,MYL9,MYLK,MYLPF,PFN3,TTN
Actin Cytoskeleton Signaling	9.48	0.115	-3.266	ACTA1,ACTG2,Actn3,ARHGEF4,ARPC5L,ERAS,GSN,ITGA2B,KRAS,MAPK1,MYH1,MYH11,MYH2,MYH3,MYH4,MYH6,MYH7,MYH8,MYL1,MYL12B,MYL9,MYLK,MYLPF,NRAS,PFN3,TTN,VAV3,VCL
RHOGDI Signaling	5.92	0.0955	2.333	ACTA1,ACTG2,ARHGDIB,ARHGEF4,ARPC5L,GNA11,GNAQ,GNG10,ITGA2B,MYH1,MYH11,MYH2,MYH3,MYH4,MYH6,MYH7,MYH8,MYL1,MYL12B,MYL9,MYLPF
Signaling by Rho Family GTPases	2.05	0.0562	-1.508	ACTA1,ACTG2,ARHGEF4,ARPC5L,GNA11,GNAQ,GNG10,ITGA2B,MAPK1,MYL1,MYL12B,MYL9,MYLK,MYLPF,STMN1
Integrin Signaling	3.95	0.0802	-2.84	ACTA1,ACTG2,Actn3,ARPC5L,CAPNS1,ERAS,GSN,ITGA2B,KRAS,MAPK1,MYL12B,MYL9,MYLK,NRAS,PFN3,TTN,VCL
Paxillin Signaling	3.05	0.0935	-1.414	ACTA1,ACTG2,Actn3,ERAS,ITGA2B,KRAS,MAPK1,NRAS,PTPN12,VCL
Epithelial Adherens Junction Signaling	1.47	0.0573	-1.667	ARPC5L,ERAS,KRAS,MYH2,MYH4,MYL12B,NRAS,SNAI1,VCL
ILK Signaling	3.71	0.0796	-3	ACTA1,ACTG2,Actn3,MAPK1,MYH1,MYH11,MYH2,MYH3,MYH4,MYH6,MYH7,MYH8,MYL1,MYL9,SNAI1,VCL
EIF2 Signaling	1.91	0.0573	-0.632	ACTA1,ACTG2,ERAS,HSPA5,KRAS,MAPK1,NRAS,Ppp1cc,Rpl22l1,RPL28,RPL35A,RPL37,RPL37A
GÎ±12/13 Signaling	1.88	0.0677	-0.707	ERAS,KRAS,MAPK1,MYL1,MYL12B,MYL9,MYLPF,NRAS,VAV3
GÎ±i Signaling	1.75	0.0643	0.447	CHRM4,ERAS,GNA11,GNAQ,GNG10,KRAS,MAPK1,NRAS,S1PR1
Table S3B: Top biological pathways in retina (p < 0.05) identified through IPA for post-TBI in 1% LA diet group
Ingenuity Canonical Pathways	-log(p-value)	Ratio	z-score	Molecules
Autophagy	1.55	0.0324	-0.816	BNIP3,LAMP2,PPP2R2B,PPP3CA,SIRT1,WIPI1,WIPI2
Activation of IRF by Cytosolic Pattern Recognition Receptors	3.61	0.0923	0.816	DHX58,IFIH1,IRF7,IRF9,ISG15,STAT1
Regulation Of The Epithelial Mesenchymal Transition By Growth Factors Pathway	1.33	0.0312	1	EGR1,FGF3,FGF4,KRAS,TGFB3,ZEB2
Macrophage Classical Activation Signaling Pathway	1.36	0.0317	1.633	HLA-DQA1,IRF9,PARP14,PARP9,STAT1,TGFB3
Interferon Signaling	3.93	0.139	2	IFITM3,IRF9,ISG15,OAS1,STAT1
Th1 Pathway	1.6	0.041	2.236	CD274,HLA-A,HLA-DQA1,RT1-DMa,STAT1
Role of PKR in Interferon Induction and Antiviral Response	1.42	0.0368	2.236	EIF2AK2,HSPA8,IFIH1,IRF9,STAT1
Multiple Sclerosis Signaling Pathway	3.03	0.045	2.53	HLA-A,HLA-DQA1,IL17RB,PARP14,PARP9,RNF213,RT1-DMa,STAT1,TGFB3,UBR2
Pathogen Induced Cytokine Storm Signaling Pathway	1.9	0.0296	3.317	COL5A2,COL8A2,Ddx58,DHX58,HLA-DQA1,IFIH1,IRF7,IRF9,RT1-DMa,STAT1,TGFB3

## Sheet: Table S4
Table S4: Common DEGs (p < 0.05) between 1% LA and 8% LA diet groups post-UWT
DEGs	Retina 1% LA Diet UWT		Retina 8% LA Diet UWT
	pv.a1	fc.a1	pv.a1	fc.a1
Adipoq	0.00465001	-0.770019	0.0405709	0.406185
Ahnak	0.0455471	-0.624862	0.0435886	0.573861
Angpt1	0.0163707	-0.524003	0.0494385	0.605213
Arhgef6	0.011948	-0.296251	0.012928	0.237993
Arpc4	0.0185375	-0.356941	0.00702286	0.359183
Bin2	0.0346228	-0.326498	0.0320362	0.213285
Cald1	0.0414672	-0.434959	0.0173511	0.684614
Casp8	0.0160197	-0.380456	0.0426221	0.220637
Cd96	0.034552	-0.298376	0.0341243	0.224564
Col14a1	0.0454081	-0.335991	0.0400452	0.184869
Ddit4l	0.0087025	-0.480993	0.0447601	0.325239
Fam46b	0.0168703	-0.339151	0.0219923	0.253441
Fermt1	0.00384794	-0.432782	0.0071377	0.311975
Fndc3c1	0.00716649	-0.265023	0.02367	0.169101
Gnb4	0.00334273	-0.434013	0.0444975	0.209094
Gpr65	0.00305399	-0.350244	0.00191679	0.255891
Insl6	0.0205632	-0.33573	0.0425768	0.209072
Itgbl1	0.000598299	-1.07528	0.0390489	0.363497
Mettl20	0.0138566	-0.34924	0.0402857	0.298882
Pqlc3	0.0121776	-0.458174	0.0179535	0.328918
Prrx1	0.0260155	-0.390312	0.0422384	0.358142
Ptgs1	0.000470325	-0.650449	0.044857	0.26632
Ptpn13	0.00924025	-0.468634	0.0445035	0.237351
Rarres1	0.00317981	-0.74858	0.0340154	0.342259
Rnase4	0.0433305	-0.362227	0.0190366	0.609774
S100a7a	0.00243287	-0.488449	0.0450044	0.241499
Serpinb11	0.013568	-0.439823	0.0317053	0.251241
Slfn3	0.00510719	-0.730319	0.0446466	0.33584
Snx33	0.0405965	-0.277578	0.0161859	0.195693
Spic	0.00941212	-0.441969	0.0158096	0.264022
Tbx1	0.0287099	-0.725168	0.0474834	0.61433
Tceanc2	0.0384319	-0.223631	0.0477849	0.257777
Tmem144	0.0437177	-0.26464	0.0468245	0.215923
Tmem54	0.0114851	-0.223321	0.0470926	0.181916
Tnfrsf26	0.00865852	-0.432938	0.0331944	0.239452
Ugt2b7	0.00106628	-0.486443	0.0413282	0.251437
Wdr49	0.00428807	-0.239785	0.00332663	0.330286
Wdr72	0.0238274	-0.181442	0.0158251	0.160559
Wnt10a	0.0478243	-0.335248	0.0383751	0.373815
Abca13	0.0479149	0.164674	0.0321606	-0.248553
Arhgef9	0.00431488	0.310559	0.0112039	-0.262659
Barhl2	0.0423211	0.213766	0.0406241	-0.175902
Car4	0.00766966	0.426398	0.0282663	-0.510325
Cbln4	0.00675653	0.553598	0.0297122	-0.296728
Cd40	0.00331518	0.296168	0.0155297	-0.220474
Cldn10	0.0428467	0.345637	0.0212855	-0.275565
Ephb1	0.00705885	0.59754	0.0380832	-0.442933
Gldn	0.0237216	0.450282	0.011395	-0.544575
Gpr155	0.0451876	0.188325	0.0141626	-0.207103
Gpr75	0.0381843	0.615756	0.0314136	-0.452677
Gria2	0.00302743	0.670249	0.00789395	-0.338649
Grrp1	0.0109919	0.314202	0.0319051	-0.220295
Hmg20a	0.0210463	0.27067	0.0113893	-0.270041
Htr1d	0.00373094	0.274336	0.0156834	-0.17486
Insrr	0.0269665	0.198964	0.0262021	-0.176191
Kcnj1	0.0416028	0.508115	0.00948372	-0.454998
Khdrbs2	0.00256001	0.653214	0.038482	-0.626541
LRRTM1	0.0329548	0.462837	0.0362328	-0.229274
Mdh1b	0.0486415	0.309633	0.0275976	-0.215276
Myt1	0.00575954	0.529023	0.0470001	-0.294812
Olr1616	0.0152489	0.189509	0.0451813	-0.135582
Oprl1	0.00684397	0.54169	0.0114681	-0.389909
Pcbp2	0.00905151	0.592988	0.0144122	-0.284242
Pcdhga7	0.0151453	0.387283	0.00974283	-0.26303
Pgm2l1	0.0300557	0.414401	0.01085	-0.444525
Pou4f3	0.0197326	0.515239	0.00321018	-0.346839
Ptpn20	0.0176077	0.367346	0.00823851	-0.277871
Spocd1-ps1	0.0123081	0.312641	0.0431975	-0.20958
Tc2n	0.0313317	0.60502	0.0328325	-0.388804
Tcl1a	0.0028344	0.176981	0.0344764	-0.122994
Tmem169	0.0343248	0.159533	0.0297776	-0.468481
Vom2r47	0.0257643	0.394425	0.0327496	-0.391176

## Sheet: Table S5
Table S5: Top biological pathways in retina (p < 0.05) identified through IPA in 1% LA diet group post-stress
Ingenuity Canonical Pathways	-log(p-value)	Ratio	z-score	Molecules
Toll-like Receptor Signaling	7.17	0.372	-2.828	CD14,FOS,IL18,IL1A,IL1B,IL1F10,IL1RL1,IL1RN,IL36B,IL36G,IRAK3,IRAK4,LBP,LY96,MAP2K6,MAP3K7,MYD88,RPS27A,SIGIRR,TLR5,TLR6,TLR8,TNF,TOLLIP,TRAF1,TRAF4,Ubb,UBC,UBD
IL-8 Signaling	3	0.21	-2.795	ANGPT1,CXCR1,CYBB,ERAS,FNBP1,FOS,GNA15,GNAI1,GNAS,GNB1L,GNB4,GNG11,GNG12,GNG5,IKBKE,IRAK3,IRAK4,ITGAX,ITGB2,KRAS,LASP1,MAPK10,MMP2,MMP9,NAPEPLD,NCF2,NFKBIE,PDGFC,PGF,PIK3CA,PIK3R4,PLCB2,PLD1,PRKCB,PRKCE,RAP2B,RHOB,RHOBTB1,RHOC,RHOT1,RHOV,RPS6KB1,RRAS2,VEGFC
IL-6 Signaling	3.64	0.248	-2.785	CD14,CEBPB,CRP,ERAS,FOS,IKBKE,IL18,IL1A,IL1B,IL1F10,IL1R2,IL1RAPL2,IL1RL1,IL1RN,IL36B,IL36G,IL6,KRAS,LBP,MAP2K6,MAP3K7,MAPK10,NFKBIE,PIK3CA,PIK3R4,RAP2B,RRAS2,SOS1,TNF,TNFRSF11B,TNFRSF1A,TNFRSF1B
IL-1 Signaling	3.31	0.26	-1.387	ADCY10,ADCY2,ADCY4,ADCY5,FOS,GNA15,GNAI1,GNAS,GNB1L,GNB4,GNG11,GNG12,GNG5,GUCY1B1,IKBKE,IL1A,IRAK3,IRAK4,MAP2K6,MAP3K7,MAPK10,MYD88,NFKBIE,PRKAR1B,TOLLIP
IL-17 Signaling	2.19	0.198	-4.11	ATF2,CCL11,CCL17,CCL20,CEBPB,CXCL3,ERAS,FOS,IL17A,IL18,IL1A,IL1B,IL1F10,IL36B,IL36G,IL5,IL6,KRAS,LTB,MAP2K6,MAP3K7,MAPK10,MMP13,MMP2,MMP3,MMP9,PDGFC,PGF,PIK3CA,PIK3R4,RAP2B,RRAS2,TGFB1,TNF,TNFRSF11B,Tnfsf9,VEGFC
IL-10 Signaling	1.36	0.182	1.134	ATF2,BHLHE40,CREB3L3,FCGR2A,FCGR2B,FOS,HLA-A,HLA-DRB5,IFNGR1,IKBKE,IL10RB,IL18,IL1A,IL1B,IL1F10,IL1R2,IL1RAPL2,IL1RL1,IL1RN,IL36B,IL36G,IL6,INPP5D,MAP2K6,MAP3K7,NFKBIE,PRKAB2,TNF
IL-15 Production	5.74	0.293	-1.667	ABL1,ALK,AXL,BLK,BTK,CSK,DSTYK,EPHA1,EPHA2,EPHA4,EPHA5,EPHB1,EPHB4,FGFR2,FGR,FRK,FYN,HCK,IL6,IRF1,JAK3,LCK,MAP2K6,MET,MST1R,NTRK1,NTRK2,NTRK3,RET,ROR2,ROS1,RYK,SYK,TXK,TYRO3,ZAP70
Leukotriene Biosynthesis	2.06	0.4	-2.236	ALOX5,ALOX5AP,DPEP1,DPEP2,GGT1,GGT5
Pyroptosis Signaling Pathway	2.09	0.226	-4.146	AIM2,CASP1,CASP4,CASP8,GAS5,GBP5,GSDMD,IL18,IL1A,IL1B,NLRC4,NLRP1,NLRP3,PRKAR1B,TLR5,TLR6,TLR8,TNF,TNFRSF11B,TNFRSF1A,TNFRSF1B
Necroptosis Signaling Pathway	2.47	0.212	-3.307	AXL,BIRC3,CAMK2B,CAMK2D,CAMK2G,CAPN1,CAPN6,CAPN8,CASP1,CASP8,CYBB,FAS,GLUD1,MAP3K7,NLRP3,PLA2G2A,PLA2G2D,RB1,RIPK3,TIMM8A,Timm8a2,TIMM8B,TNF,TNFRSF11B,TNFRSF1A,TNFRSF1B,TOMM20L,TOMM7,TOMM70,TRADD,TYRO3,UBC,VDAC2
Apoptosis Signaling	2.12	0.221	-1.091	BCL2A1,BCL2L11,BIRC3,CAPN1,CAPN6,CAPN8,CASP6,CASP8,Cyct,ENDOG,ERAS,FAS,IKBKE,KRAS,NFKBIE,PLCG2,PRKCE,RAP2B,RRAS2,SPTAN1,TNF,TNFRSF1A,TNFRSF1B
S100 Family Signaling Pathway	5.64	0.189	-2.317	ADGRA1,ADGRB3,ADGRG1,ADGRG6,ADGRL4,ADRA2C,AHNAK,AREG,ATF2,AVPR1A,AVPR1B,BDKRB1,C5AR1,C5AR2,CACNA2D3,CACNB3,CACNG3,CACNG6,CALCR,CAMK2B,CAMK2D,CAMK2G,CCL20,CCL4,CCR6,CCRL2,CD36,CREB3L3,CRHR1,CXCR1,CXCR6,CYBB,DRD1,EDNRA,EGF,EREG,F2R,F2RL1,F2RL2,FCGR1A,FCGR2A,FCGR2B,FCGR3A/FCGR3B,FFAR4,FGFR2,FOS,FZD9,GALR1,GPR107,GPR137,GPR137C,GPR149,GPR155,GPR171,GPR174,GPR18,GPR183,GPR37L1,GPR61,GPR65,GPR75,GPR84,…
Neuroinflammation Signaling Pathway	1.76	0.174	-2.546	ACVR1B,ATF2,BIRC3,CASP1,CASP8,CD200R1,CD40,CREB3L3,CRP,CXCL10,CYBB,FAS,FOS,GABRB3,GABRG3,GABRP,GABRR2,GRIN2A,GRIN2D,GRIN3A,GRIN3B,HLA-A,HLA-DRB5,IFNGR1,IKBKE,IL18,IL1B,IL6,IRAK3,IRAK4,JAK3,KCNJ3,KCNJ6,MAPK10,MMP3,MMP9,MYD88,NCF2,NLRP3,NTF3,PIK3CA,PIK3R4,PLA2G2A,PLA2G2D,PLCG2,S100B,SOD2,SYK,TGFB1,TGFBR2,TLR5,TLR6,TLR8,TNF,TNFRSF1A
Inflammasome pathway	3.32	0.45	-2.333	AIM2,CASP1,CASP8,IL18,IL1B,MYD88,NLRC4,NLRP1,NLRP3
Immunogenic Cell Death Signaling Pathway	2.26	0.233	-3.71	ATG12,BCAP31,CASP1,CASP8,CGAS,CXCL10,GZMB,Gzmc,Gzmn,HSPA1A/HSPA1B,IFNGR1,IL1B,IL6,NLRP3,P2RY2,PRF1,RIPK3,TNF,TNFRSF11B,TNFRSF1A,TNFRSF1B
Natural Killer Cell Signaling	2.02	0.192	-2.137	CD244,CD247,CFL2,ERAS,FCGR2A,FCGR3A/FCGR3B,FYN,HCST,HLA-A,HSPA1A/HSPA1B,IL18,IL2RB,IRAK4,JAK3,KLRB1,KLRC1,KRAS,LCK,LCP2,MAP3K6,MAP3K7,MAP3K8,MYD88,NCR1,NCR3,PAK3,PAK5,PIK3CA,PIK3R4,PLCG2,RAP2B,RASSF5,RRAS2,SOS1,SYK,VAV1,VAV3,ZAP70
Neutrophil Extracellular Trap Signaling Pathway	2.02	0.172	-3.204	ABHD3,BLK,CASP1,CASP14,CASP4,CASP6,CASP8,CD14,COL12A1,Col17a1,COL6A5,CYBB,FCGR3A/FCGR3B,FGR,FRK,FYN,GSDMD,H4C6,HCK,IL1B,ITGB2,ITPR3,LCK,LTF,MAP2K6,MAP3K7,MAPK10,MMP2,MMP9,MT-ATP6,MT-ND4,MT-ND6,NCF2,NDUFA10,NDUFB2,NDUFB3,NDUFB4,NDUFS4,NLRP3,PADI4,PF4,PIK3CA,PIK3R4,PLA2G2A,PLA2G2C,PLA2G2D,PLA2G7,PLA2R1,PLAAT3,PLCB2,PLCB3,PLCD1,PLCG2,PLCH1,PLCL1,PNPLA2,PNPLA3,PRKCB,PRKCE,PRTN3,RIPK3,SYK,TIMM8A,Timm8…
Leukocyte Extravasation Signaling	3.53	0.223	-1.521	ABL1,ARHGAP8/PRR5-ARHGAP8,ARHGAP9,BTK,CD44,CLDN1,CLDN10,CLDN19,CLDN23,CLDN4,CTNNA2,CYBA,CYBB,F11R,GNAI1,ITGA4,ITGB2,JAM2,MAPK10,MMP10,MMP12,MMP13,MMP19,MMP2,MMP3,MMP9,MSN,NCF2,PECAM1,PIK3CA,PIK3R4,PLCG2,PRKCB,PRKCE,RAPGEF3,RAPGEF4,RASSF5,RDX,SPN,TIMP3,TXK,VAV1,VAV3
Th1 Pathway	1.35	0.189	-1.342	CD247,CD3E,CD3G,CD40,HLA-A,HLA-DRB5,ICOS,ICOSLG/LOC102723996,IFNGR1,IL10RB,IL18,IL27RA,IL6,IRF1,ITGB2,JAK3,KLRC1,MAP2K6,PIK3CA,PIK3R4,RUNX3,TRB,VAV1
Th2 Pathway	1.49	0.19	-2.683	ACVR1B,CD247,CD3E,CD3G,CD40,CXCR6,GFI1,HLA-A,HLA-DRB5,ICOS,ICOSLG/LOC102723996,IL1RL1,IL24,IL2RB,IL5,ITGB2,JAK3,PIK3CA,PIK3R4,RUNX3,STAT6,TGFB1,TGFBR2,TIMD4,TRB,VAV1
Fc Epsilon RI Signaling	2.94	0.237	-0.816	BTK,ERAS,FCER1A,FYN,GAB1,IGHE,IL5,INPP5D,KRAS,LCP2,MAP2K6,MAPK10,MS4A2,OCRL,PIK3CA,PIK3R4,PLA2G2A,PLA2G2D,PLCG2,PRKCB,PRKCE,RAP2B,RRAS2,SOS1,SYK,TNF,VAV1,VAV3
Macrophage Alternative Activation Signaling Pathway	3.1	0.213	-2.592	ABCA1,ATF2,CCL17,CD36,CEBPB,CLEC10A,CREB3L3,FCER1A,FCGR2B,FOS,GNB1L,H4C6,HLA-DRB5,IL10RB,IL18,IL1A,IL1B,IL1F10,IL1R2,IL1RN,IL36B,IL36G,IL6,IRF4,IRS1,JAK3,KLF4,MRC1,NFKBIE,NR1H4,PF4,PIK3CA,PIK3R4,PPARG,PPARGC1A,RPS6KA4,RPS6KB1,RXRG,STAT6,SYK,TGFB1,TNF,ZC3H12A
FcÎ³ Receptor-mediated Phagocytosis in Macrophages and Monocytes	2.36	0.234	-2.558	ACTR2,ARPC3,ARPC4,DGKB,FCGR1A,FCGR2A,FCGR3A/FCGR3B,FGR,FYN,HCK,INPP5D,LCP2,NAPEPLD,NCK2,PLD1,PRKCB,PRKCE,PTEN,RPS6KB1,SYK,VAV1,VAV3
Phagosome Formation	9.61	0.216	-2.887	ABHD3,ACTR2,ADGRA1,ADGRB3,ADGRG1,ADGRG6,ADGRL4,ADRA2C,AP1G1,AP1M2,AP1S2,APBB1IP,ARPC3,ARPC4,AVPR1A,AVPR1B,BDKRB1,C5AR1,C5AR2,CALCR,CARD9,CCR6,CCRL2,CD14,CD36,CFL2,CRHR1,CXCR1,CXCR6,DRD1,EDNRA,ERAS,F2R,F2RL1,F2RL2,FCER1A,FCGR1A,FCGR2A,FCGR2B,FCGR3A/FCGR3B,FFAR4,FGR,FN1,FYN,FZD9,GALR1,GPR107,GPR137,GPR137C,GPR149,GPR155,GPR171,GPR174,GPR18,GPR183,GPR37L1,GPR61,GPR65,GPR75,GPR84,GPR85,GPR87,GPRC5A,G…
Production of Nitric Oxide and Reactive Oxygen Species in Macrophages	2.28	0.199	-3	ALB,APOC2,CYBA,CYBB,FNBP1,FOS,HOXA10,IFNGR1,IKBKE,IRF1,JAK3,MAP3K6,MAP3K7,MAP3K8,MAPK10,NCF2,NFKBIE,PIK3CA,PIK3R4,PLCG2,PON1,PPP1R10,PPP1R11,PPP1R3A,PPP2R5D,PPP2R5E,PRKCB,PRKCE,RHOB,RHOBTB1,RHOC,RHOT1,RHOV,S100A8,TNF,TNFRSF11B,TNFRSF1A,TNFRSF1B
Fatty Acid Î±-oxidation	1.32	0.286	-1.633	ALDH1A3,ALDH2,ALDH3A2,ALDH3B1,Aldh3b3,BCO2
iNOS Signaling	1.8	0.255	-2.53	CD14,FOS,IFNGR1,IKBKE,IRAK3,IRAK4,IRF1,JAK3,LBP,LY96,MYD88,NFKBIE
eNOS Signaling	2.75	0.218	0.186	ADCY10,ADCY2,ADCY4,ADCY5,AQP8,AQP9,BDKRB1,CASP8,CCNA2,CHRNA3,CHRNA4,CHRNA6,CHRNB2,CHRND,CHRNG,GNAS,GUCY1B1,HSPA1A/HSPA1B,ITPR3,KNG1,LPAR1,LPAR3,LPAR6,NOS3,PDGFC,PGF,PIK3CA,PIK3R4,PLCG2,PRKAB2,PRKAR1B,PRKCB,PRKCE,VEGFC
Eicosanoid Signaling	3.78	0.3	-0.632	ABHD3,ALOX12,ALOX5,ALOX5AP,DPEP1,DPEP2,GGT1,HPGDS,PLA2G2A,PLA2G2C,PLA2G2D,PLA2G7,PLA2R1,PLAAT3,PNPLA2,PNPLA3,PTGDR,PTGER3,PTGFR,PTGS1,TBXAS1
Glioma Invasiveness Signaling	3.5	0.288	-2.524	CD44,ERAS,F2R,FNBP1,KRAS,MMP2,MMP9,PIK3CA,PIK3R4,PLAU,PLAUR,PLG,RAP2B,RHOB,RHOBTB1,RHOC,RHOT1,RHOV,RRAS2,TIMP3,VTN
Pathogen Induced Cytokine Storm Signaling Pathway	3.89	0.199	-6.277	AIM2,BHLHE40,CASP1,CASP8,CCL11,CCL17,Ccl2,CCL20,CCL28,CCL4,Ccl7,Ccl9,CCR6,CGAS,COL12A1,Col17a1,COL6A5,CRP,CXCL10,CXCL2,Cxcl3,CXCL3,CXCR1,FGB,FGG,FOS,GSDMD,GZMB,HLA-DRB5,IFIH1,IFNGR1,IL17A,IL18,IL1A,IL1B,IL1F10,IL1R2,IL1RAPL2,IL1RL1,IL1RN,IL21R,IL36B,IL36G,IL5,IL6,IRF1,LTB,MAPK10,MYD88,NLRC4,NLRP3,NOD1,PDGFC,PF4,PGF,Ppbp,PRF1,RIPK3,RYR1,RYR3,SLC2A5,STX11,SYK,TGFB1,TLR5,TLR6,TLR8,TNF,TNFRSF11B,TNFR…
CCR3 Signaling in Eosinophils	1.38	0.187	-0.258	CCL11,CFL2,ERAS,GNA15,GNAI1,GNAS,GNB1L,GNB4,GNG11,GNG12,GNG5,ITPR3,KRAS,PAK3,PAK5,PIK3CA,PIK3R4,PLA2G2A,PLA2G2D,PLCB2,PLCB3,PRKCB,PRKCE,RAP2B,RRAS2
CXCR4 Signaling	3.03	0.22	-0.557	ADCY10,ADCY2,ADCY4,ADCY5,EGR1,ERAS,FNBP1,FOS,GNA15,GNAI1,GNAS,GNB1L,GNB4,GNG11,GNG12,GNG5,GUCY1B1,ITPR3,KRAS,MAPK10,MYL3,MYL4,PAK3,PAK5,PIK3CA,PIK3R4,PLCB2,PLCB3,PRKCB,PRKCE,RAP2B,RHOB,RHOBTB1,RHOC,RHOT1,RHOV,RRAS2
Synaptic Long Term Depression	3.28	0.217	1.581	ABHD3,CACNA2D3,CACNB3,CACNG3,CACNG6,CRH,CRHR1,ERAS,GNA15,GNAI1,GNAS,GRIA2,GRID2,GRM3,GRM6,GRM8,GUCY1B1,ITPR3,KRAS,NOS3,NPR3,PLA2G2A,PLA2G2C,PLA2G2D,PLA2G7,PLA2R1,PLAAT3,PLCB2,PLCB3,PLCD1,PLCG2,PLCH1,PLCL1,PNPLA2,PNPLA3,PPP2R5D,PPP2R5E,PRKCB,PRKCE,RAP2B,RRAS2,RYR1,RYR3
Synaptogenesis Signaling Pathway	8.23	0.251	1.835	ACTR2,ADCY10,ADCY2,ADCY4,ADCY5,AP2M1,ARPC3,ARPC4,ATF2,CACNB3,CAMK2B,CAMK2D,CAMK2G,CDH10,CDH12,CDH15,CDH17,CDH19,CDH20,CDH3,CDH7,CDH8,CNTNAP1,CREB3L3,EFNA1,EFNA4,EPHA1,EPHA2,EPHA4,EPHA5,EPHB1,EPHB4,ERAS,FGR,FYN,GRIA2,GRIN2A,GRIN2D,GRIN3A,GRIN3B,GRM3,GRM6,GRM8,GUCY1B1,HCK,KRAS,LCK,LRRTM2,NLGN1,NRXN2,Nrxn3,NTRK2,PIK3CA,PIK3R4,PLCG2,PRKAR1B,PRKCE,RAP2B,RAPGEF1,RASGRF1,RPS6KB1,RRAS2,SHC3,SHF,SOS1,STX1…
SNARE Signaling Pathway	2.02	0.206	0.756	ADCY10,ADCY2,ADCY4,ADCY5,CACNB3,CAMK2B,CAMK2D,CAMK2G,GUCY1B1,MYH10,MYH3,MYL3,MYL4,PRKAR1B,RAB9B,SNAP23,SNAP29,STX16,SYN1,SYN2,SYT1,SYT10,SYT12,SYT2,SYT6,SYT9,VTI1A,YKT6
Endocannabinoid Neuronal Synapse Pathway	3.44	0.235	0.928	ADCY10,ADCY2,ADCY4,ADCY5,CACNA2D3,CACNB3,CACNG3,CACNG6,DNAH3,GNA15,GNAI1,GNB1L,GNB4,GNG11,GNG12,GNG5,GRIA2,GRIN2A,GRIN2D,GRIN3A,GRIN3B,GUCY1B1,ITPR3,KCNJ3,KCNJ6,MAPK10,NAPEPLD,PLCB2,PLCB3,PLCD1,PLCG2,PLCH1,PLCL1,PRKAR1B,TRPV1
Synaptic Long Term Potentiation	4.18	0.258	-0.174	ATF2,CAMK2B,CAMK2D,CAMK2G,CREB3L3,ERAS,GNA15,GRIA2,GRIN2A,GRIN2D,GRIN3A,GRIN3B,GRM3,GRM6,GRM8,ITPR3,KRAS,PLCB2,PLCB3,PLCD1,PLCG2,PLCH1,PLCL1,Ppp1cc,PPP1R10,PPP1R11,PPP1R1A,PPP1R3A,PRKAR1B,PRKCB,PRKCE,RAP2B,RAPGEF3,RRAS2
Glutamate Receptor Signaling	2.79	0.273	1.667	GNB1L,GNB4,GNG11,GNG12,GNG5,GRIA2,GRID2,GRIK2,GRIK4,GRIN2A,GRIN2D,GRIN3A,GRIN3B,GRIP1,GRM3,GRM6,GRM8,SLC17A6
γ-glutamyl Cycle	1.7	0.385	-2.236	ANPEP,GGCT,GGT1,GGT5,OPLAH
Calcium Signaling	2.59	0.2	2.121	ATF2,ATP2A3,ATP2B1,ATP2B2,ATP2B3,CACNA2D3,CACNB3,CACNG3,CACNG6,CAMK2B,CAMK2D,CAMK2G,CASQ2,CHRNA3,CHRNA4,CHRNA6,CHRNB2,CHRND,CHRNG,CREB3L3,GRIA2,GRIN2A,GRIN2D,GRIN3A,GRIN3B,HDAC1,ITPR3,MYH10,MYH3,MYL3,MYL4,PRKAR1B,RAP2B,RCAN2,RYR1,RYR3,SLC8A1,SLC8A3,TNNI1,TNNT2,TP63,Trpc2,TRPC6,TRPC7
G Beta Gamma Signaling	2.34	0.217	0.408	ADCY2,ARHGEF6,BTK,CACNA2D3,CACNB3,CACNG3,CACNG6,CAV3,ERAS,GNA15,GNAI1,GNAS,GNB1L,GNB4,GNG11,GNG12,GNG5,ITPR3,KCNJ3,KCNJ6,KRAS,PLCG2,PRKAR1B,PRKCB,PRKCE,RAP2B,RRAS2,SOS1
Dopamine-DARPP32 Feedback in cAMP Signaling	3.91	0.231	-0.18	ADCY10,ADCY2,ADCY4,ADCY5,ATF2,ATP2A3,CACNA2D3,CACNB3,CACNG3,CACNG6,CREB3L3,CSNK1D,DRD1,GNAI1,GNAS,GRIN2A,GRIN2D,GRIN3A,GRIN3B,GUCY1B1,ITPR3,KCNJ1,KCNJ11,KCNJ16,KCNJ3,KCNJ6,PAWR,PLCB2,PLCB3,PLCD1,PLCG2,PLCH1,PLCL1,Ppp1cc,PPP1R10,PPP1R11,PPP1R1B,PPP1R3A,PPP2R5D,PPP2R5E,PRKAR1B,PRKCB,PRKCE
Dopamine Receptor Signaling	1.55	0.212	1.414	ADCY10,ADCY2,ADCY4,ADCY5,COMT,DDC,DRD1,GCH1,GUCY1B1,Ppp1cc,PPP1R10,PPP1R11,PPP1R1B,PPP1R3A,PPP2R5D,PPP2R5E,PRKAR1B
Dopamine Degradation	1.73	0.281	-2.121	ALDH1A3,ALDH2,ALDH3A2,ALDH3B1,Aldh3b3,COMT,LRTOMT,SULT1B1,Sult1c2/Sult1c2a
Noradrenaline and Adrenaline Degradation	1.75	0.27	-1.897	Adh6a,ADH7,AKR1A1,ALDH1A3,ALDH2,ALDH3A2,ALDH3B1,Aldh3b3,COMT,LRTOMT
Serotonin Degradation	1.4	0.211	-2.673	Adh6a,ADH7,AKR1A1,ALDH1A3,ALDH2,ALDH3A2,ALDH3B1,Aldh3b3,SULT1B1,Sult1c2/Sult1c2a,UGT1A6,UGT2B15,UGT2B17,UGT2B4,UGT2B7
Tryptophan Degradation X (Mammalian, via Tryptamine)	1.72	0.296	-1.134	AKR1A1,Akr1b7,ALDH1A3,ALDH2,ALDH3A2,ALDH3B1,Aldh3b3,DDC
Histamine Degradation	1.32	0.286	-0.816	ALDH1A3,ALDH2,ALDH3A2,ALDH3B1,Aldh3b3,HNMT
Neurovascular Coupling Signaling Pathway	2.6	0.198	0.745	ABHD3,CACNA2D3,CACNB3,CACNG3,CACNG6,ENTPD1,ENTPD2,GABRB3,GABRG3,GABRP,GABRR2,GRIA2,GRIN2A,GRIN2D,GRIN3A,GRIN3B,GUCY1B1,ITPR3,KCNJ1,KCNJ11,KCNJ16,KCNJ3,KCNJ6,KCNMA1,KCNMB1,KCNMB2,KCNN1,KCNN4,KNG1,NOS3,NPR3,PLA2G2A,PLA2G2C,PLA2G2D,PLA2G7,PLA2R1,PLAAT3,PLCB2,PLCB3,PNPLA2,PNPLA3,PRKAR1B,PTGS1,RYR1,RYR3,TRPV4
CREB Signaling in Neurons	5.92	0.199	0.095	ADCY10,ADCY2,ADCY4,ADCY5,ADGRA1,ADGRB3,ADGRG1,ADGRG6,ADGRL4,ADRA2C,ATF2,AVPR1A,AVPR1B,BDKRB1,C5AR1,C5AR2,CACNA2D3,CACNB3,CACNG3,CACNG6,CALCR,CAMK2B,CAMK2D,CAMK2G,CCR6,CCRL2,CREB3L3,CRHR1,CXCR1,CXCR6,DRD1,EDNRA,EGF,ERAS,F2R,F2RL1,F2RL2,FFAR4,FGFR2,FZD9,GALR1,GHR,GNA15,GNAI1,GNAS,GNB1L,GNB4,GNG11,GNG12,GNG5,GPR107,GPR137,GPR137C,GPR149,GPR155,GPR171,GPR174,GPR18,GPR183,GPR37L1,GPR61,GPR65,GPR75,GPR…
Opioid Signaling Pathway	5.63	0.232	0.263	ADCY10,ADCY2,ADCY4,ADCY5,AP2M1,ATF2,BLK,CACNA2D3,CACNB3,CACNG3,CACNG6,CAMK2B,CAMK2D,CAMK2G,CLTA,CREB3L3,ERAS,FGR,FOS,FRK,FYN,GNA15,GNAI1,GNAS,GNB1L,GNB4,GNG11,GNG12,GNG5,GRIN2A,GRIN2D,GRIN3A,GRIN3B,GRK1,GUCY1B1,HCK,ITPR3,KCNJ3,KCNJ6,KRAS,LCK,MAP2K6,NOS3,OPRL1,PDE1A,PDK1,PRKAR1B,PRKCB,PRKCE,RAP2B,RGS1,RGS11,RGS18,RGS19,RGS5,RGS6,RGS7,RGS8,RPS6KA4,RPS6KB1,RRAS2,RYR1,RYR3,SOS1,TCF7L2
Neuropathic Pain Signaling In Dorsal Horn Neurons	4.58	0.287	2.414	CAMK2B,CAMK2D,CAMK2G,FOS,GRIA2,GRIN2A,GRIN2D,GRIN3A,GRIN3B,GRM3,GRM6,GRM8,ITPR3,KCNN1,KCNN4,KCNQ3,NTRK2,PIK3CA,PIK3R4,PLCB2,PLCB3,PLCD1,PLCG2,PLCH1,PLCL1,PRKAR1B,PRKCB,PRKCE,TACR1
Neuregulin Signaling	2.67	0.231	-1.291	AREG,EGF,ERAS,EREG,GRB7,ITGA1,ITGA10,ITGA11,ITGA4,ITGA5,ITGA9,ITGAX,ITGB2,ITGB4,ITGB6,ITGB7,KRAS,NRG1,PLCG2,PRKCB,PRKCE,PTEN,RAP2B,RPS6KB1,RRAS2,SOS1,TGFA
ERBB Signaling	2.42	0.237	-0.218	AREG,EGF,ERAS,EREG,FOS,KRAS,MAP2K6,MAPK10,NCK2,NRG1,PAK3,PAK5,PIK3CA,PIK3R4,PLCG2,PRKCB,PRKCE,RAP2B,RPS6KB1,RRAS2,SOS1,TGFA
Reelin Signaling in Neurons	3.09	0.232	0.378	ACTR2,ARHGEF26,ARHGEF28,ARHGEF33,ARHGEF5,ARHGEF6,ARHGEF9,ARPC3,ARPC4,BLK,CAMK2B,CAMK2D,CAMK2G,DNAH3,FGR,FRK,FYN,GRIN2A,GRIN2D,GRIN3A,GRIN3B,HCK,ITGA5,LCK,MAP2K6,MAPK10,MAPK8IP1,PDK1,PIK3CA,PIK3R4,RAPGEF1,VLDLR
Neurotrophin/TRK Signaling	1.65	0.218	-0.577	ATF2,CREB3L3,ERAS,FOS,GAB1,KRAS,MAP2K6,NTF3,NTRK1,NTRK2,NTRK3,PIK3CA,PIK3R4,RAP2B,RRAS2,SORCS1,SOS1
GDNF Family Ligand-Receptor Interactions	2.08	0.237	-1	ARTN,DOK1,DOK5,ERAS,FOS,GAB1,GFRA2,IRS1,ITPR3,KRAS,MAPK10,PIK3CA,PIK3R4,PLCG2,RAP2B,RET,RRAS2,SOS1
Sphingosine-1-phosphate Signaling	3.52	0.25	0.577	ACER2,ADCY10,ADCY2,ADCY4,ADCY5,CASP1,CASP14,CASP4,CASP6,CASP8,FNBP1,GNAI1,GUCY1B1,PDGFC,PIK3CA,PIK3R4,PLCB2,PLCB3,PLCD1,PLCG2,PLCH1,PLCL1,RHOB,RHOBTB1,RHOC,RHOT1,RHOV,S1PR4,SMPD1,SPHK1
Semaphorin Neuronal Repulsive Signaling Pathway	3.06	0.227	0.928	Acan,BCAN,CD44,CFL2,CSPG4,CSPG5,FYN,GUCY1B1,ITGA1,ITGA10,ITGA11,ITGA4,ITGA5,ITGA9,ITGAX,ITGB2,ITGB4,ITGB6,ITGB7,MAP2K6,MYL3,MYL4,NRP2,PAK3,PAK5,PDE4B,PIK3CA,PIK3R4,PLCG2,PLXNA2,PRKAR1B,SEMA5A,SEMA6A,STK11
Adrenomedullin signaling pathway	4.79	0.241	-1.18	ADCY10,ADCY2,ADCY4,ADCY5,ADM,CEBPB,CSK,ERAS,FOS,GNA15,GNAS,GUCY1B1,IL18,IL1A,IL1B,IL1F10,IL1RN,IL36B,IL36G,ITPR3,KCNN1,KCNN4,KCNQ3,KRAS,MAP2K6,MAPK10,MMP2,MYLK3,NOS3,NPR3,PIK3CA,PIK3R4,PLCB2,PLCB3,PLCD1,PLCG2,PLCH1,PLCL1,PPARG,PRKAR1B,RAMP3,RAP2B,RRAS2,RXRG,SHC3,SHF,SOS1,TNF
Ephrin Receptor Signaling	7.2	0.272	-1.061	ABL1,ACTR2,ANGPT1,ARPC3,ARPC4,ATF2,CFL2,CREB3L3,DOK1,EFNA1,EFNA4,EGF,EPHA1,EPHA2,EPHA4,EPHA5,EPHB1,EPHB4,ERAS,FYN,GNA15,GNAI1,GNAS,GNB1L,GNB4,GNG11,GNG12,GNG5,GRIN2A,GRIN2D,GRIN3A,GRIN3B,ITGA1,ITGA10,ITGA11,ITGA4,ITGA5,ITGA9,ITGAX,ITGB2,ITGB4,ITGB6,ITGB7,KRAS,NCK2,PAK3,PAK5,PDGFC,PGF,PTPN13,RAP2B,RAPGEF1,RRAS2,SOS1,VEGFC
Amyotrophic Lateral Sclerosis Signaling	1.58	0.198	0.229	BIRC3,CACNA2D3,CACNB3,CACNG3,CACNG6,CAPN1,CAPN6,CAPN8,CASP1,GRIA2,GRID2,GRIK2,GRIK4,GRIN2A,GRIN2D,GRIN3A,GRIN3B,HECW1,PDGFC,PGF,PIK3CA,PIK3R4,VEGFC
Multiple Sclerosis Signaling Pathway	3.27	0.212	-3.647	ASIC1,C5,C8A,C8B,CAPN1,CAPN6,CAPN8,CASP1,CASP8,FAS,GAS5,GRIN2A,GRIN2D,GRIN3A,GRIN3B,HLA-A,HLA-DRB5,IFNGR1,IL17A,IL18,IL1A,IL1B,IL1F10,IL36B,IL36G,IL5,IL6,IRF1,IRF4,LTB,MMP9,NLRP1,NLRP3,PARP3,PARP9,PLAU,PPARG,RNF213,SLC8A1,SLC8A3,TGFB1,TLR5,TLR6,TLR8,TNF,TNFRSF1A,Tnfsf9
Neuroprotective Role of THOP1 in Alzheimer's Disease	1.62	0.198	-2.837	CFD,CMA1,ENDOU,FAP,GZMB,HGFAC,HLA-A,KLK10,KLK12,KLK5,KLK6,KLK8,KNG1,MMP9,PLG,PRKAR1B,Prss1 (includes others),PRSS12,PRSS22,PRSS38,PRSS55,PRTN3,TMPRSS11D,TMPRSS9
Protein Kinase A Signaling	5.49	0.212	0.843	ADCY10,ADCY2,ADCY4,ADCY5,AKAP11,ANAPC4,ATF2,CAMK2B,CAMK2D,CAMK2G,CDC25C,CDC27,CREB3L3,DHH,DUSP15,DUSP2,DUSP9,ENPP1,EPM2A,FLNC,GNAI1,GNAS,GNB1L,GNB4,GNG11,GNG12,GNG5,GRK1,GUCY1B1,GYS2,H1f0,ITPR3,KDELR3,LIPE,MYH10,MYL3,MYL4,MYLK3,NAPEPLD,NFKBIE,NOS3,PDE11A,PDE12,PDE1A,PDE4B,PDE5A,PDE6B,PDE6C,PDE6D,PLCB2,PLCB3,PLCD1,PLCG2,PLCH1,PLCL1,Ppp1cc,PPP1R10,PPP1R11,PPP1R1B,PPP1R3A,PRKAR1B,PRKCB,PRKCE,PTCH1,P…
VEGF Family Ligand-Receptor Interactions	1.36	0.202	-0.775	ERAS,FOS,KRAS,NOS3,NRP2,PGF,PIK3CA,PIK3R4,PLA2G2A,PLA2G2D,PLCG2,PRKCB,PRKCE,RAP2B,RRAS2,SOS1,VEGFC
Endothelin-1 Signaling	5.11	0.247	-1.474	ABHD3,ADCY10,ADCY2,ADCY4,ADCY5,CASP1,CASP14,CASP4,CASP6,CASP8,EDNRA,ERAS,FOS,GAB1,GNA15,GNAI1,GNAS,GUCY1B1,ITPR3,KRAS,MAPK10,NAPEPLD,NOS3,PIK3CA,PIK3R4,PLA2G2A,PLA2G2C,PLA2G2D,PLA2G7,PLA2R1,PLAAT3,PLCB2,PLCB3,PLCD1,PLCG2,PLCH1,PLCL1,PLD1,PNPLA2,PNPLA3,PRKCB,PRKCE,PTGS1,RAP2B,RRAS2,SHC3,SHF,SOS1
Thrombin Signaling	5.24	0.24	-0.632	ADCY10,ADCY2,ADCY4,ADCY5,ARHGEF26,ARHGEF28,ARHGEF33,ARHGEF5,ARHGEF6,ARHGEF9,CAMK2B,CAMK2D,CAMK2G,EGF,ERAS,F2,F2R,F2RL2,FNBP1,GATA1,GATA2,GATA6,GNA15,GNAI1,GNAS,GNB1L,GNB4,GNG11,GNG12,GNG5,GUCY1B1,ITPR3,KRAS,MYL3,MYL4,PIK3CA,PIK3R4,PLCB2,PLCB3,PLCD1,PLCG2,PLCH1,PLCL1,PRKCB,PRKCE,RAP2B,RHOB,RHOBTB1,RHOC,RHOT1,RHOV,RPS6KB1,RRAS2,SOS1
Intrinsic Prothrombin Activation Pathway	2.21	0.286	-2.714	F2,FGB,FGG,KLK10,KLK12,KLK14,KLK5,KLK6,KLK8,KLK9,KNG1,SERPINC1
Apelin Endothelial Signaling Pathway	2.07	0.206	-0.218	ADCY10,ADCY2,ADCY4,ADCY5,ANGPT1,ERAS,FOS,GNA15,GNAI1,GNAS,GNB1L,GNB4,GNG11,GNG12,GNG5,GUCY1B1,KRAS,MAPK10,NOS3,PIK3CA,PIK3R4,PLCB2,PLCB3,PRKAB2,PRKCB,PRKCE,RAP2B,RPS6KB1,RRAS2
Aldosterone Signaling in Epithelial Cells	1.4	0.18	1.698	ABCC9,AHCY,ASIC1,ASIC2,Dnajb3,DNAJB6,DNAJC14,DNAJC22,DNAJC25,DNAJC28,HSCB,HSPA12A,HSPA1A/HSPA1B,HSPB8,ITPR3,KCNMA1,KCNMB1,KCNMB2,KRAS,PI4KA,PIK3CA,PIK3R4,PLCB2,PLCB3,PLCD1,PLCG2,PLCH1,PLCL1,PRKCB,PRKCE,SOS1
P2Y Purigenic Receptor Signaling Pathway	2.74	0.226	-0.6	ADCY10,ADCY2,ADCY4,ADCY5,ATF2,CREB3L3,ERAS,FOS,GNAI1,GNB1L,GNB4,GNG11,GNG12,GNG5,GUCY1B1,KRAS,P2RY2,PIK3CA,PIK3R4,PLCB2,PLCB3,PLCD1,PLCG2,PLCH1,PLCL1,PRKAR1B,PRKCB,PRKCE,RAP2B,RRAS2
Aryl Hydrocarbon Receptor Signaling	2.61	0.214	-1.606	AHRR,ALDH1A3,ALDH1L1,ALDH2,ALDH3A2,ALDH3B1,ALDH5A1,ATM,CCNA2,CCNE1,CDK6,CDKN2A,CHEK2,Cyp2c23,CYP2C8,CYP3A7,FAS,FOS,GSTA1,GSTA3,GSTA5,Gstm6,IL1A,IL1B,IL6,MGST1,NCOA2,NFIX,NQO1,NR0B2,RB1,RXRG,TGFB1,TNF
Xenobiotic Metabolism PXR Signaling Pathway	2.48	0.203	-2.402	ABCC2,ALDH1A3,ALDH1L1,ALDH2,ALDH3A2,ALDH3B1,ALDH5A1,CAMK2B,CAMK2D,CAMK2G,CES5A,CHST1,CHST2,CITED2,CYP2C8,CYP3A7,GRIP1,GSTA1,GSTA3,GSTA5,Gstm6,HS3ST2,MGST1,NR1I2,PPARGC1A,Ppp1cc,PPP1R10,PPP1R11,PPP1R3A,PRKAR1B,PRKCB,PRKCE,SULT1B1,Sult1c2/Sult1c2a,UGT1A6,UGT2B15,UGT2B17,UGT2B4,UGT2B7
Xenobiotic Metabolism AHR Signaling Pathway	2.44	0.241	-2.4	AHRR,ALDH1A3,ALDH1L1,ALDH2,ALDH3A2,ALDH3B1,ALDH5A1,GSTA1,GSTA3,GSTA5,Gstm6,IL1A,IL1B,IL6,MGST1,NCOA2,NQO1,PON1,SENP1,TNF,UGT1A6
Xenobiotic Metabolism CAR Signaling Pathway	1.42	0.178	-2.744	ABCC2,ALDH1A3,ALDH1L1,ALDH2,ALDH3A2,ALDH3B1,ALDH5A1,CHST1,CHST2,CITED2,CYP2C8,CYP3A7,FMO1,FMO3,GRIP1,GSTA1,GSTA3,GSTA5,Gstm6,HS3ST2,MAP2K6,MGST1,PPARGC1A,PPP2R5D,PPP2R5E,PRKCB,PRKCE,SULT1B1,Sult1c2/Sult1c2a,UGT1A6,UGT2B15,UGT2B17,UGT2B4,UGT2B7
PXR/RXR Activation	1.72	0.231	0.775	ABCC2,ALDH3A2,CYP2C8,CYP3A7,FOXA2,G6PC1,GSTA1,HNF4A,IL6,Ins1,NR0B2,NR1I2,PPARGC1A,PRKAR1B,TNF
PPARÎ±/RXRÎ± Activation	4.04	0.231	1.715	ABCA1,ACVR1B,ADCY10,ADCY2,ADCY4,ADCY5,ADIPOQ,CD36,Cyp2c23,CYP2C8,ERAS,GHR,GNA15,GNAS,GPD2,GUCY1B1,IKBKE,IL1B,IL1R2,IL1RAPL2,IL1RL1,IL6,Ins1,IRS1,KRAS,MAP2K6,MAP3K7,NCOA6,NFKBIE,NR0B2,PLCB2,PLCB3,PLCD1,PLCG2,PLCH1,PLCL1,PPARGC1A,PRKAB2,PRKAR1B,PRKCB,RAP2B,RRAS2,SOS1,TGFB1,TGFBR2
PPAR Signaling	4.08	0.271	3.402	CITED2,ERAS,FOS,IKBKE,IL18,IL1A,IL1B,IL1F10,IL1R2,IL1RAPL2,IL1RL1,IL1RN,IL36B,IL36G,Ins1,KRAS,MAP3K7,NFKBIE,NR0B2,PDGFC,PPARG,PPARGC1A,RAP2B,RRAS2,SOS1,TNF,TNFRSF11B,TNFRSF1A,TNFRSF1B
LXR/RXR Activation	6.2	0.301	1.859	ABCA1,ALB,AMBP,APOC2,C4A/C4B,CD14,CD36,GC,HPX,IL18,IL1A,IL1B,IL1F10,IL1R2,IL1RAPL2,IL1RL1,IL1RN,IL36B,IL36G,IL6,KNG1,LBP,LDLR,LY96,MMP9,MSR1,MYLIP,NR1H4,PON1,RXRG,S100A8,SERPINF2,TNF,TNFRSF11B,TNFRSF1A,TNFRSF1B,VTN
LPS/IL-1 Mediated Inhibition of RXR Function	5.5	0.236	-2.449	ABCA1,ABCC2,ACSL1,ACSL5,ALDH1A3,ALDH1L1,ALDH2,ALDH3A2,ALDH3B1,ALDH5A1,APOC2,CD14,CHST1,CHST2,Cyp2c23,CYP2C8,Cyp2d1/Cyp2d5,Cyp2d22,CYP2D6,CYP2F1,CYP3A7,FABP1,FABP4,FMO1,FMO3,GSTA1,GSTA3,GSTA5,Gstm6,HS3ST2,IL18,IL1A,IL1B,IL1F10,IL1R2,IL1RAPL2,IL1RL1,IL1RN,IL36B,IL36G,LBP,LIPC,LY96,MAP3K7,MGMT,MGST1,MYD88,NR0B2,NR1H4,NR1I2,NR5A2,PPARGC1A,SLC10A1,SLC27A6,SULT1B1,Sult1c2/Sult1c2a,TNF,TNFRSF11B,TNFRSF1…
VDR/RXR Activation	2.68	0.256	-0.577	CD14,CEBPB,CXCL10,CYP24A1,HES1,HOXA10,HR,IGFBP5,IGFBP6,IL1RL1,KLF4,KLK6,LRP5,NCOA2,PRKCB,PRKCE,RUNX2,RXRG,TRPV5,WT1
Actin Cytoskeleton Signaling	3.9	0.217	-0.707	ACTR2,APC2,ARHGEF6,ARPC3,ARPC4,BAIAP2,CD14,CFL2,CSK,EGF,ERAS,F2,F2R,FGF12,FGF21,FGF22,FGF9,FN1,GNG12,Ins1,IQGAP3,ITGA1,ITGA10,ITGA11,ITGA4,ITGA5,ITGA9,ITGAX,ITGB2,ITGB4,ITGB6,ITGB7,KNG1,KRAS,LBP,MSN,MYH10,MYH3,MYL3,MYL4,MYLK3,PAK3,PAK5,PDGFC,PFN3,PIK3CA,PIK3R4,RAP2B,RDX,RRAS2,SOS1,VAV1,VAV3
Signaling by Rho Family GTPases	4.79	0.225	-0.309	ACTR2,ARHGEF5,ARHGEF6,ARHGEF9,ARPC3,ARPC4,BAIAP2,CDH10,CDH12,CDH15,CDH17,CDH19,CDH20,CDH3,CDH7,CDH8,CFL2,CYBB,FNBP1,FOS,GNA15,GNAI1,GNAS,GNB1L,GNB4,GNG11,GNG12,GNG5,ITGA1,ITGA10,ITGA11,ITGA4,ITGA5,ITGA9,ITGAX,ITGB2,ITGB4,ITGB6,ITGB7,MAP3K20,MAPK10,MSN,MYL3,MYL4,NCF2,PAK3,PAK5,PI4KA,PIK3CA,PIK3R4,PLD1,RDX,RHOB,RHOBTB1,RHOC,RHOT1,RHOV,SEPTIN6,SEPTIN8,SEPTIN9
RHOGDI Signaling	5.9	0.25	0.507	ACTR2,ARHGAP8/PRR5-ARHGAP8,ARHGAP9,ARHGEF5,ARHGEF6,ARHGEF9,ARPC3,ARPC4,CD44,CDH10,CDH12,CDH15,CDH17,CDH19,CDH20,CDH3,CDH7,CDH8,CFL2,DGKZ,FNBP1,GNA15,GNAI1,GNAS,GNB1L,GNB4,GNG11,GNG12,GNG5,GRIP1,ITGA1,ITGA10,ITGA11,ITGA4,ITGA5,ITGA9,ITGAX,ITGB2,ITGB4,ITGB6,ITGB7,MSN,MYH10,MYH3,MYL3,MYL4,PAK3,PAK5,PI4KA,RDX,RHOB,RHOBTB1,RHOC,RHOT1,RHOV
Integrin Signaling	3.18	0.212	-2.16	ABL1,ACTR2,ARF5,ARPC3,ARPC4,BCAR3,CAPN1,CAPN6,CAPN8,ERAS,FNBP1,FYN,GRB7,ITGA1,ITGA10,ITGA11,ITGA4,ITGA5,ITGA9,ITGAX,ITGB2,ITGB4,ITGB6,ITGB7,KRAS,MYLK3,NCK2,PAK3,PAK5,PFN3,PFN4,PIK3CA,PIK3R4,PLCG2,PTEN,RAP2B,RAPGEF1,RHOB,RHOBTB1,RHOC,RHOT1,RHOV,RRAS2,SOS1,TSPAN3
ILK Signaling	2.13	0.194	-3.333	ARHGEF6,ATF2,CFL2,CREB3L3,FLNC,FN1,FNBP1,FOS,IRS1,ITGB2,ITGB4,ITGB6,ITGB7,KRT18,MAP2K6,MAPK10,MMP9,MYH10,MYH3,MYL3,MYL4,NCK2,PDGFC,PGF,PIK3CA,PIK3R4,PPP2R5D,PPP2R5E,PTEN,RHOB,RHOBTB1,RHOC,RHOT1,RHOV,RPS6KA4,RSU1,TNF,TNFRSF1A,VEGFC
Paxillin Signaling	2.27	0.224	-0.535	ARHGEF6,CSK,ERAS,ITGA1,ITGA10,ITGA11,ITGA4,ITGA5,ITGA9,ITGAX,ITGB2,ITGB4,ITGB6,ITGB7,KRAS,MAPK10,NCK2,PAK3,PAK5,PIK3CA,PIK3R4,RAP2B,RRAS2,SOS1
Actin Nucleation by ARP-WASP Complex	4.4	0.29	-1.807	ACTR2,ARPC3,ARPC4,BAIAP2,ERAS,FNBP1,ITGA1,ITGA10,ITGA11,ITGA4,ITGA5,ITGA9,ITGAX,ITGB2,ITGB4,ITGB6,ITGB7,KRAS,NCK2,RAP2B,RHOB,RHOBTB1,RHOC,RHOT1,RHOV,RRAS2,SOS1
HIF1Î± Signaling	2.58	0.202	-1.852	ADM,CAMK2B,CAMK2D,CAMK2G,CYBB,EGF,ERAS,FOXP3,GCK,HK1,HK3,HSPA1A/HSPA1B,IL17A,IL6,KRAS,Ldha/RGD1562690,LDHC,MAP2K6,MET,MMP10,MMP12,MMP13,MMP19,MMP2,MMP3,MMP9,NCF2,PDGFC,PGF,PIK3CA,PIK3R4,PLCG2,PRKCB,PRKCE,RAP2B,RPS6KB1,RRAS2,SERPINE1,SLC2A5,TGFA,TGFB1,VEGFC
CDK5 Signaling	3.49	0.252	-1.8	ABL1,ADCY10,ADCY2,ADCY4,ADCY5,CABLES1,CAPN1,DRD1,EGR1,ERAS,GNAS,GUCY1B1,KRAS,LAMA1,LAMA5,LAMC1,LAMC2,MAPK10,NTRK2,Ppp1cc,PPP1R10,PPP1R11,PPP1R1B,PPP1R3A,PPP2R5D,PPP2R5E,PRKAR1B,RAP2B,RRAS2
EIF2 Signaling	2.11	0.189	-1.633	AGO1,EIF1AX,EIF1AY,EIF2B1,EIF2B2,EIF2S3,EIF3B,EIF3F,EIF4A3,ERAS,HNRNPA1,Ins1,KRAS,PABPC1,PAIP1,PIK3CA,PIK3R4,Ppp1cc,RAP2B,RPL13,RPL15,Rpl22l1,RPL31,RPL35,RPL35A,RPL36,Rpl36a,RPL36AL,RPL37,Rpl39l,RPL6,RPL7,RPL7A,RPS15A,RPS16,RPS2,RPS21,RPS23,RPS25,RPS27A,RPS27L,RRAS2,SOS1
PI3K/AKT Signaling	2.92	0.21	-1.789	CXCR1,EPM2A,ERAS,GAB1,GHR,GYS2,IKBKE,IL10RB,IL1R2,IL1RL1,IL21R,IL27RA,IL2RB,IL9R,INPP5D,ITGA1,ITGA10,ITGA11,ITGA4,ITGA5,ITGA9,ITGAX,ITGB2,ITGB4,ITGB6,ITGB7,JAK3,KRAS,MAP3K8,MAPK8IP1,NFKBIE,NOS3,OCRL,PIK3CA,PPP2R5D,PPP2R5E,PTEN,RAP2B,RPS6KB1,RRAS2,SOS1,YWHAB
AMPK Signaling	1.84	0.182	0.2	ADIPOQ,ADRA2C,AK5,AK6,ATF2,CCNA2,CHRNA3,CHRNA4,CHRNA6,CHRNB2,CHRND,CHRNG,CREB3L3,EPM2A,FOXO6,GNA15,GNAI1,GNAS,GNB1L,GNB4,GNG11,GNG12,GNG5,GYS2,HNF4A,Ins1,IRS1,LIPE,MAP3K7,NOS3,PFKFB1,PFKFB2,PFKP,PHF10,PIK3CA,PIK3R4,PPARGC1A,PPP2R5D,PPP2R5E,PRKAB2,PRKAR1B,RAB9B,RPS6KB1,STK11

## Sheet: Table S6
Table S6A: Top biological pathways in retina (p < 0.05) identified through IPA in 8% LA diet group post-stress
Ingenuity Canonical Pathways	-log(p-value)	Ratio	z-score	Molecules
Endocannabinoid Neuronal Synapse Pathway	1.45	0.0403	-2.236	CACNB4,CNR1,GNB4,GRIA2,GRIN1,KCNJ9
Opioid Signaling Pathway	1.39	0.0321	-2.121	AKT2,CACNB4,CAMK4,GNB4,GRIN1,KCNJ9,NOS1,OPRL1,RYR2
CREB Signaling in Neurons	1.95	0.0297	-2	ADGRG5,AKT2,CACNB4,CAMK4,CNR1,GNB4,GPR155,GPR65,GPR75,GRIA2,GRIN1,HTR1D,NGFR,NPY5R,OPRL1,POLR2F,PTGDR,SMO
Neurovascular Coupling Signaling Pathway	2.81	0.0474	-1.508	CACNB4,CYP4A22,GABRG2,GRIA2,GRIN1,KCNJ1,KCNJ9,NOS1,PTGS1,RYR2,TRPC3
Calcium Signaling	4.79	0.0636	-1.414	ATP2A1,CACNB4,CAMK4,CHRNB3,GRIA2,GRIN1,HDAC9,MYH4,RYR2,TNNC2,TNNI2,Tnnt3,Tpm2,TRPC3
Dopamine-DARPP32 Feedback in cAMP Signaling	2.45	0.0484	-1.342	ATP2A1,CACNB4,CAMK4,GRIN1,KCNJ1,KCNJ9,NOS1,PPP1R14D,PPP2R1B
Reelin Signaling in Neurons	1.59	0.0435	0	AKT2,ARHGEF6,ARHGEF9,ARPC4,CNR1,GRIN1
Ephrin Receptor Signaling	1.74	0.0396	0.816	AKT2,ANGPT1,ARPC4,EPHB1,GNB4,GRIN1,KALRN,PTPN13
Amyotrophic Lateral Sclerosis Signaling	1.38	0.0431	-1	BID,CACNB4,GRIA2,GRIN1,NOS1
Neuroinflammation Signaling Pathway	1.45	0.0315	-0.707	AKT2,BACE1,CASP8,CD40,GABRG2,GRIN1,HLA-A,KCNJ9,NOX3,S100G
Natural Killer Cell Signaling	1.79	0.0404	0.707	AKT2,CD244,CD48,HLA-A,HSPA8,KIR3DL3,LAIR1,NCR1
RHOGDI Signaling	1.55	0.0364	-0.816	ACTG2,ARHGEF6,ARHGEF9,ARPC4,CDH11,GNB4,MYH4,RND3
Signaling by Rho Family GTPases	1.5	0.0337	0	ACTG2,ARHGEF6,ARHGEF9,ARPC4,CDH11,GNB4,MYLK,NOX3,RND3
TREM1 Signaling	1.43	0.0519	0	AKT2,CD40,NLRP4,NLRP9
CDK5 Signaling	1.4	0.0435	-1	EGR1,LAMA3,NGFR,PPP1R14D,PPP2R1B
Table S6B: Top biological pathways in retina (p < 0.05) identified through IPA in HC diet group post-stress
Ingenuity Canonical Pathways	-log(p-value)	Ratio	z-score	Molecules
IL-10 Signaling	1.98	0.0584	1	AHR,DDIT4,HLA-A,HLA-E,HLA-G,MAP3K14,PKM,PRDM1,SIRT1
Endocannabinoid Neuronal Synapse Pathway	1.62	0.0537	-0.707	ADCY4,ADCY9,CACNA1I,CACNA2D1,CACNA2D4,CHP1,GRIN1,PLCE1
Dopamine-DARPP32 Feedback in cAMP Signaling	1.5	0.0484	-0.816	ADCY4,ADCY9,CACNA2D1,CACNA2D4,CHP1,GRIN1,KCNJ10,PLCE1,PPM1L

## Sheet: Table S7
Table S7: Common retinal signaling mechanisms (p < 0.05) between UWT (Table S7A) and TBI insult (Table S7B) in 8% LA diet group, and their corresponding shared DEGs (Table S7C)
Table S7A: Biological pathways (p < 0.05) in retina identified through IPA in 8% LA diet group post-UWT
Ingenuity Canonical Pathways	-log(p-value)	Ratio	z-score	Molecules
Calcium Signaling	4.79	0.0636	-1.414	ATP2A1,CACNB4,CAMK4,CHRNB3,GRIA2,GRIN1,HDAC9,MYH4,RYR2,TNNC2,TNNI2,Tnnt3,Tpm2,TRPC3
Ephrin Receptor Signaling	1.74	0.0396	0.816	AKT2,ANGPT1,ARPC4,EPHB1,GNB4,GRIN1,KALRN,PTPN13
RHOGDI Signaling	1.55	0.0364	-0.816	ACTG2,ARHGEF6,ARHGEF9,ARPC4,CDH11,GNB4,MYH4,RND3
Signaling by Rho Family GTPases	1.5	0.0337	0	ACTG2,ARHGEF6,ARHGEF9,ARPC4,CDH11,GNB4,MYLK,NOX3,RND3
Endocannabinoid Neuronal Synapse Pathway	1.45	0.0403	-2.236	CACNB4,CNR1,GNB4,GRIA2,GRIN1,KCNJ9
Opioid Signaling Pathway	1.39	0.0321	-2.121	AKT2,CACNB4,CAMK4,GNB4,GRIN1,KCNJ9,NOS1,OPRL1,RYR2
Table S7B: Biological pathways (p < 0.05) in retina identified through IPA in 8% LA diet group post-TBI
Ingenuity Canonical Pathways	-log(p-value)	Ratio	z-score	Molecules
Calcium Signaling	8.44	0.114	-0.333	ACTA1,ATP2A1,CACNA1E,CACNA1S,CASQ1,HDAC11,ITPR1,MAPK1,MYH1,MYH11,MYH2,MYH3,MYH4,MYH6,MYH7,MYH8,MYL1,MYL9,SLC8A1,TNNC2,TNNI2,Tnnt3,Tpm1,Tpm2,TRDN
Ephrin Receptor Signaling	1.55	0.0545	-0.333	ARPC5L,CXCL12,ERAS,GNA11,GNAQ,GNG10,ITGA2B,KRAS,MAPK1,NRAS,RGS3
RHOGDI Signaling	5.92	0.0955	2.333	ACTA1,ACTG2,ARHGDIB,ARHGEF4,ARPC5L,GNA11,GNAQ,GNG10,ITGA2B,MYH1,MYH11,MYH2,MYH3,MYH4,MYH6,MYH7,MYH8,MYL1,MYL12B,MYL9,MYLPF
Signaling by Rho Family GTPases	2.05	0.0562	-1.508	ACTA1,ACTG2,ARHGEF4,ARPC5L,GNA11,GNAQ,GNG10,ITGA2B,MAPK1,MYL1,MYL12B,MYL9,MYLK,MYLPF,STMN1
Endocannabinoid Neuronal Synapse Pathway	1.6	0.0604	-0.707	CACNA1E,CACNA1S,GNA11,GNAQ,GNG10,ITPR1,KCNJ9,MAPK1,PLCB1
Opioid Signaling Pathway	2.21	0.0571	0	CACNA1E,CACNA1S,ERAS,GNA11,GNAQ,GNG10,GRK1,GRK3,ITPR1,KCNJ9,KRAS,MAPK1,NRAS,PLCB1,POMC,RGS3
Table S7C: Effect of different traumatic insult on the expression of common retinal genes in the 8% LA diet group
Retina 8% LA Diet_DEGs	Blast-TBI		UWT
	pv.a1	fc.a1	pv.a1	fc.a1
Tnnc2	0.00218493	-3.0305	0.0101724	1.8662
Atp2a1	0.00527052	-2.22641	0.0258498	1.15523
Tnnt3	0.00963859	-1.9794	0.0177226	0.894681
Tnni2	0.00811616	-1.78363	0.0211541	1.30006
Myh4	0.0265841	-1.32712	0.0320468	0.586667
Tpm2	0.0260982	-0.868141	0.0124529	0.455175
Actg2	0.0357785	-0.630682	0.0392996	1.13635
Mylk	0.0496245	-0.337134	0.0485318	0.532067
Kcnj9	0.00184423	-0.36075	0.0274128	-0.328868

## Sheet: Table S8
Table S8: Common retinal signaling pathways (p < 0.05) between UWT (Table S8A) and TBI insult (Table S8B) in 1% LA diet group, and their corresponding shared DEGs (Table S8C)
Table S8A: Biological pathways (p < 0.05) in retina identified through IPA in 1% LA diet group post-UWT
Ingenuity Canonical Pathways	-log(p-value)	Ratio	z-score	Molecules
Regulation Of The Epithelial Mesenchymal Transition By Growth Factors Pathway	3.01	0.214	-3	CDH12,EGF,EGR1,ERAS,FGF12,FGF21,FGF22,FGF9,FGFR2,FOS,GAB1,GSC,IKBKE,IL6,JAK3,KRAS,LTB,MAP2K6,MAP3K7,MAPK10,MET,MMP2,MMP9,PDGFC,PIK3CA,PIK3R4,RAP2B,RRAS2,SHC3,SMURF1,SOS1,TGFB1,TGFBR2,TNF,TNFRSF11B,TNFRSF1A,TNFRSF1B,TNFSF18,TWIST1,WWTR1,ZEB2
Th1 Pathway	1.35	0.189	-1.342	CD247,CD3E,CD3G,CD40,HLA-A,HLA-DRB5,ICOS,ICOSLG/LOC102723996,IFNGR1,IL10RB,IL18,IL27RA,IL6,IRF1,ITGB2,JAK3,KLRC1,MAP2K6,PIK3CA,PIK3R4,RUNX3,TRB,VAV1
Multiple Sclerosis Signaling Pathway	3.27	0.212	-3.647	ASIC1,C5,C8A,C8B,CAPN1,CAPN6,CAPN8,CASP1,CASP8,FAS,GAS5,GRIN2A,GRIN2D,GRIN3A,GRIN3B,HLA-A,HLA-DRB5,IFNGR1,IL17A,IL18,IL1A,IL1B,IL1F10,IL36B,IL36G,IL5,IL6,IRF1,IRF4,LTB,MMP9,NLRP1,NLRP3,PARP3,PARP9,PLAU,PPARG,RNF213,SLC8A1,SLC8A3,TGFB1,TLR5,TLR6,TLR8,TNF,TNFRSF1A,Tnfsf9
Pathogen Induced Cytokine Storm Signaling Pathway	3.89	0.199	-6.277	AIM2,BHLHE40,CASP1,CASP8,CCL11,CCL17,Ccl2,CCL20,CCL28,CCL4,Ccl7,Ccl9,CCR6,CGAS,COL12A1,Col17a1,COL6A5,CRP,CXCL10,CXCL2,Cxcl3,CXCL3,CXCR1,FGB,FGG,FOS,GSDMD,GZMB,HLA-DRB5,IFIH1,IFNGR1,IL17A,IL18,IL1A,IL1B,IL1F10,IL1R2,IL1RAPL2,IL1RL1,IL1RN,IL21R,IL36B,IL36G,IL5,IL6,IRF1,LTB,MAPK10,MYD88,NLRC4,NLRP3,NOD1,PDGFC,PF4,PGF,Ppbp,PRF1,RIPK3,RYR1,RYR3,SLC2A5,STX11,SYK,TGFB1,TLR5,TLR6,TLR8,TNF,TNFRSF11B,TNFR…
Table S8B: Biological pathways (p < 0.05) in retina identified through IPA in 1% LA diet group post-TBI
Ingenuity Canonical Pathways	-log(p-value)	Ratio	z-score	Molecules
Regulation Of The Epithelial Mesenchymal Transition By Growth Factors Pathway	1.33	0.0312	1	EGR1,FGF3,FGF4,KRAS,TGFB3,ZEB2
Th1 Pathway	1.6	0.041	2.236	CD274,HLA-A,HLA-DQA1,RT1-DMa,STAT1
Multiple Sclerosis Signaling Pathway	3.03	0.045	2.53	HLA-A,HLA-DQA1,IL17RB,PARP14,PARP9,RNF213,RT1-DMa,STAT1,TGFB3,UBR2
Pathogen Induced Cytokine Storm Signaling Pathway	1.9	0.0296	3.317	COL5A2,COL8A2,Ddx58,DHX58,HLA-DQA1,IFIH1,IRF7,IRF9,RT1-DMa,STAT1,TGFB3
Table S8C: Effect of different traumatic insult on the expression of common retinal genes in the 1% LA diet group
Retina 1% LA Diet - DEGs	UWT		Blast-TBI
	pv.a1	fc.a1	pv.a1	fc.a1
Kras	0.0407529	0.286878	0.0496522	0.172562
Egr1	0.0172559	-0.416882	0.0204295	0.706726
Parp9	0.0486884	-0.331011	0.0368999	0.506302
Rnf213	0.0487565	-0.270427	0.0340148	0.452371
Ifih1	0.0200796	-0.295883	0.0372784	0.324425
Zeb2	0.0140889	-0.79716	0.00804575	-0.570682
